# Supplementary material for: A Systematic Review of Utilisation of Diurnal Timing Information in Clinical Trial Design for Long QT Syndrome
Source: Front Pharmacol. 2022 Mar 15;13:867131. doi: 10.3389/fphar.2022.867131 (PMC8965098; doi:10.3389/fphar.2022.867131)
Supplement: Supplementary file 1 [file DataSheet1.xlsx]

## Sheet: key
sheet name	trials listed
deduplicated	a deduplicated list of the clinical trials from searching EU and US clinical trials databases
screened full-text	the trials that provided sufficiently detailed information to allow for full-text screening
reviewed in-depth	the trials that recorded ECG and were reviewed in-depth
analysed - LQTS	the trials that investigated patients with LQTS and provided sufficient detail on method of ECG recording
analysed - QT-prolongating drug	the trials that investigated the QT-prolonging effects of a drug and provided sufficient detail on method of ECG recording

## Sheet: deduplicated
	Title	US study number	EU study number	study start date	study end date	study type
	Measurement of the Electromechanical Window to Improve the Diagnosis of Congenital Long QT Syndrome	NCT04328378		2020-05-01	2022-05-01	interventional
	Long QT Syndrome Screening in Newborns	NCT02412709		2015-06-01	2016-12-01	interventional, phase 2
	Prevalence of Congenital Long QT Syndrome and Acquired QT Prolongation in a Hospital Cohort	NCT03544918		2015-06-01	2018-12-01	observational
	Prospective Identification of Long QT Syndrome in Fetal Life	NCT02876380		2014-11-01	2020-12-01	observational
	The Canadian National Long QT Syndrome Registry	NCT02425189		2014-11-01	2025-12-01	observational
	The Long QT Syndrome in Pregnancy	NCT00488254		2007-06-01	2011-04-01	observational (cohort, retrospective)
	Effect of Eleclazine on Shortening of the QT Interval, Safety, and Tolerability in Adults With Long QT Syndrome Type 3	NCT02300558	2014-000042-30	2014-12-01	2016-12-01	interventional, phase 3
	Effect of Grapefruit on QT Interval in Healthy Volunteers and Patients With Congenital Long QT Syndrome	NCT02680080		2016-12-01	2018-06-01	interventional
	Multicenter Evaluation of Children and Young Adults With Genotype Positive Long QT Syndrome	NCT01705925		2012-03-01	2018-12-01	observational (cohort)
	Effect of Oral GS-6615 on Dofetilide-Induced QT Prolongation, Safety, and Tolerability in Healthy Adults	NCT02365532		2015-02-01	2015-05-01	interventional, phase 1
	Abnormal QT-Response to the Sudden Tachycardia Provoked by Standing in Individuals With Drug-induced Long QT Syndrome	NCT02581241		2016-01-01	2017-08-01	interventional
	Long Term Prophylactic Therapy of Congenital Long QT Syndrome Type III (LQT3) With Ranolazine	NCT01728025		2012-10-01	2017-11-01	interventional, phase 2
	KCNQ1 Cascade Screening	NCT03783975		2019-03-01	2020-08-01	interventional
	Study of the Effect of GS-6615 in Subjects With LQT-3	NCT01849003		2013-05-01	2014-11-01	interventional, phase 1
	Novel Form of Acquired Long QT Syndrome	NCT04169100		2011-09-01	2024-03-01	interventional, phase 4
	Comparison Between Epinephrine and Exercise Test in QT Long Syndrome Patients	NCT01745666		2012-05-01	2018-05-01	interventional
	QT-prolongation in Psychiatric Hospitals	NCT02043925		2010-10-01	2015-03-01	observational (cohort, prospective)
	Determine the Incidence of Long QT Amongst a Large Cohort of Subjects Diagnosed With Unilateral or Bilateral Sensorineural Hearing Loss.	NCT02082431		2014-08-01	2019-12-01	observational (cohort, prospective)
	Genetics of QT Prolongation With Antiarrhythmics	NCT02439658		2015-05-01	2018-08-01	observational (case-control, prospective)
	Drug Interactions With Risk of QT-prolongation in a General Hospital	NCT02043912		2013-07-01	2014-02-01	observational (cohort, prospective)
	Pharmacokinetics of Eleclazine in Adults With Normal and Impaired Hepatic Function	NCT02412098		2015-03-01	2016-04-01	interventional, phase 1
	Electromechanical Profiling of the Long-QT Syndrome (LQTS)	NCT04074122		2020-01-01	2022-01-01	observational (case-control, prospective)
	Efficacy Study of Sodium Channel Blocker in LQT3 Patients	NCT01648205		2012-09-01	2020-07-01	interventional, phase 2
	Long QT Syndrome and Sleep Apnea	NCT03678311		2019-03-01	2019-04-01	interventional
	Exercise in Genetic Cardiovascular Conditions	NCT02549664		2015-05-01	2021-12-01	observational (cohort, prospective)
	Influence of Testosterone Administration on Drug-Induced QT Interval Prolongation and Torsades de Pointes	NCT02513940		2015-08-01	2019-03-01	interventional, phase 4
	Metabolism of Patients With Genetically Caused Cardiac Arrhythmia	NCT02775513		2010-09-01	2016-05-01	observational (case-control, cross-sectional)
	Pharmacokinetics of Eleclazine in Adults With Normal and Impaired Renal Function	NCT02441829		2015-05-01	2015-12-01	interventional, phase 1
	Hydroxyzine and Risk of Prolongation of QT Interval	NCT02814981		2015-11-01	2017-08-01	observational (cohort, prospective)
	Long QT Syndrome-Population Genetics and Cardiac Studies	NCT00005176		1985-08-01	2013-04-01	observational (prospective)
	Risk of QT-prolongation and Torsade de Pointes in Patients Treated With Acute Medication in a University Hospital	NCT02068170		2014-02-01	2015-03-01	observational (cohort, prospective)
	Effect of Beta-blocker Therapy on QTc Response in Exercise and Recovery in Normal Subjects	NCT00588965		2007-08-01	2008-12-01	interventional
	Exploring Mechanisms and Morphology of QT Interval Prolongation	NCT03291145		2017-06-01	2018-06-01	interventional
	Study Evaluating the Effects of Multiple Oral Doses of ERB-041 on Cardiac Repolarization in Healthy Subjects	NCT00316459		2006-05-01	2007-04-01	interventional, phase 1
	Reducing the Risk of Drug-Induced QT Interval Lengthening in Women	NCT03834883		2019-03-01	2022-06-01	interventional, phase 4
	The Physiological Effects of Human Ether-a-go-go-Related Gene (hERG)Blockade on Metabolism	NCT03868657		2019-01-01	2019-09-01	interventional
	Continuous Versus Intermittent cARdiac Electrical moNitorinG	NCT04336644		2020-08-01	2022-09-01	interventional
	A Registry to Determine the Clinical and Genetic Risk Factors for Torsade De Pointes	NCT02439645		2015-05-01	2025-10-01	observational (case-only, prospective)
	Effect of Eleclazine on QT, Safety, and Tolerability in Adults With Long QT2 Syndrome	NCT02365506		2015-07-01	2016-05-01	interventional, phase 1
	Effect of Methadone and Hydromorphone on the QT Interval After Anesthesia and Surgery	NCT03893734		2018-05-01	2020-08-01	interventional, phase 4
	QT-Prolongation in Lung Transplantation	NCT02380365		2015-04-01	2016-04-01	observational (cohort, prospective)
	Effects Rapid Atrial Pacing Has on the Electrocardiogram (ECG) in Patients With Dual Chamber Pacemakers	NCT00883610		2009-04-01	2012-06-01	observational (cohort, prospective)
	ECG Signal Collection From Long QT Syndrome, Wide QRS Complexes, Heart Failure, and Cardiac Resynchronization Patients	NCT00399412		2006-11-01	2007-12-01	observational (cohort, prospective)
	Fetal and Neonatal Magnetophysiology	NCT01903564		2014-03-01	2016-06-01	observational (cohort, prospective)
	Race Difference Moxifloxacin-induced QT Prolongation Between Healthy Chinese and Caucasian Volunteers	NCT02119091		2014-04-01	2014-06-01	interventional, phase 1
	Does Azithromycin Cause QT Prolongation in Hospitalized Patients With Severe Community Acquired Pneumonia?	NCT01553734		2012-03-01	2013-05-01	observational (cohort, prospective)
	Prevelance of Fragmented QRS Complex and Prolonged QT Interval in Cirrhotic Patients	NCT03158701		2017-06-01	2018-06-01	observational (cohort, prospective)
	Worm Study: Modifier Genes in Sudden Cardiac Death	NCT02014961		2015-04-01	2025-04-01	interventional
	CiPA Phase 1 ECG Biomarker Validation Study	NCT03070470		2017-03-01	2017-06-01	interventional, phase 1
	Ability of Late Sodium or Calcium Current Block to Balance the ECG Effects of Potassium Current Block	NCT02308748		2014-05-01	2014-06-01	interventional, phase 1
	Linkage Study of Long QT Syndrome In An Amish Kindred	NCT00005250		1990-01-01	not provided	observational
	Influence of Progesterone Administration on Drug-Induced QT Interval Lengthening	NCT01929083		2013-04-01	2014-06-01	interventional, phase 2
	Molecular Genetic Screening and Identification of Congenital Arrhythmogenic Diseases	NCT00221832		2003-10-01	2011-12-01	observational (prospective)
	Derivation of Human Induced Pluripotent Stem (iPS) Cells to Heritable Cardiac Arrhythmias	NCT02413450		2013-08-01	2023-08-01	observational (prospective)
	Safety of Local Dental Anesthesia in Patients With Cardiac Channelopathies	NCT03182777		2015-05-01	2018-08-01	interventional
	Long Term Monitoring for Risk of Sudden Death	NCT04124237		2015-05-01	2020-01-01	observational (cohort, prospective)
	Epidemiology of Long QTand Asian Sudden Death in Sleep	NCT00005367		1993-02-01	not provided	observational
	Ramosetron Pre-treatment for PONV and QT Prolongation	NCT03278522		2017-07-01	2018-02-01	interventional, phase 4
	Pediatric Lead Extractability and Survival Evaluation (PLEASE)	NCT00335036		2006-06-01	2009-01-01	interventional
	Hearts in Rhythm Organization (HiRO)National Registry and Bio Bank	NCT04189822		2019-08-01	2025-12-01	observational (prospective)
	Drug-induced Repolarization ECG Changes	NCT03642405		2018-08-01	2019-09-01	observational (cohort, prospective)
	Fetal Electrophysiologic Abnormalities in High-Risk Pregnancies Associated With Fetal Demise	NCT03775954		2018-07-01	2022-04-01	observational (cohort, prospective)
	Registry of Unexplained Cardiac Arrest	NCT00292032		2004-05-01	2021-01-01	observational (cohort, prospective)
	Selections of Subjects With Important Changes in Their Cardiac Repolarization Parameters for the Procurement of Skin and Blood Samples	NCT01338441		2011-03-01	2011-05-01	interventional, phase 1
	5-HT3 Antagonists (Antiemetics) and Cardiac Safety	NCT02436798		2014-06-01	2020-07-01	observational (prospective)
	The Effect of General Anesthesia on the Risk for Arrhythmia	NCT01174251		2010-12-01	2013-04-01	observational (cohort, prospective)
	CIQTP Prolongation : Role and Mechanism in Sudden Cardiac Death	NCT03387072		2018-03-01	2021-03-01	observational (case-control, prospective)
	Evaluation of Possible Effects on the QT/ QTc Interval of Rupatadine in Healthy Volunteers	NCT00199225		2005-02-01	not provided	interventional, phase 1
	China Inherited Ventricular Arrhythmias Registry	NCT03880708		2017-10-01	2022-10-01	observational (cohort, prospective)
	The Effect of Energy Drink on Cardiovascular Variables: A Randomized Controlled Trial	NCT03841838		2019-02-01	2019-05-01	interventional
	Low-dose Epinephrine Infusion Tests in Adolescent and Pediatric Patients	NCT00548886		2008-02-01	2012-01-01	interventional
	A Study to Investigate the Effect of Single Dose of AZD6094 (600 mg) on Cardiac Repolarization in Healthy Volunteers	NCT03258515		2017-09-01	2018-03-01	interventional, phase 1
	Genetic Sources of Variability of the Adaptation of the Ventricular Repolarisation	NCT00773201		2008-02-01	2012-03-01	interventional, phase 1
	Infant Medical Records: Case Report Proposal	NCT00268060		2004-09-01	terminated	observational (retrospective)
	Ondansetron and the QT Interval In Adult Emergency Department Patients	NCT01759420		2012-12-01	2014-05-01	observational (cohort, prospective)
	Effect of Potassium and Acetazolamide on People With Andersen-Tawil Syndrome	NCT00839501		2008-12-01	2011-01-01	interventional, phase 1
	Characteristics of Andersen-Tawil Syndrome	NCT00521794		2007-11-01	2012-10-01	observational (cohort, prospective)
	Methadone Pharmacokinetics and Cardiac Effects in Newborns	NCT00715988		2007-10-01	2012-09-01	interventional, phase 1
	Genetic Markers of Cardiovascular Disease in Epilepsy	NCT02824822		2016-05-01	2020-05-01	observational (prospective)
	A Dose Ranging Escalation Study of Tramadol Hydrochloride in Healthy Volunteers	NCT01947920		2013-08-01	2013-11-01	interventional, phase 1
	Renal Nerve Stimulation and Renal Denervation in Patients With Sympathetic Ventricular Arrhythmias	NCT02856373		2015-03-01	2020-05-01	interventional, phase 2
	Cortisone and QTc-Interval	NCT03082339		2017-04-01	2020-04-01	observational (cohort, prospective)
	Exercise Induced QT Interval Changes in Response to Intermittent and Continuous Graded Exercise Tests	NCT04005027		2019-07-01	2021-09-01	interventional
	Effect of a Multiple-dose Oral Administration of CG5503 PR on the Electrical Activity of the Heart in 48 Healthy Men and Women	NCT03951402		2003-03-01	2003-08-01	interventional, phase 1
	Azithromycin Added to Hydrochloroquine in Patients Admitted to Intensive Care With COVID-19: Randomised Controlled Trial	NCT04339816		2020-05-01	2021-12-01	interventional, phase 3
	Distribution of Cell-cell Junction Proteins in Arrhythmic Disorders	NCT04257994		2017-10-01	2022-10-01	observational (case-only, retrospective)
	To Investigate the Effect of Intravenous Ondansetron on Cardiac Conduction as Compared to Placebo and Moxifloxacin in Healthy Adult Subjects	NCT01449188		2011-08-01	2011-12-01	interventional, phase 1
	Food and Insulin Effect on QT/QTC Interval of ECG	NCT01642485		2011-07-01	2014-08-01	interventional, phase 1
	Genetics of QT Response to Moxifloxacin	NCT01936480		2013-10-01	2019-09-01	interventional, phase 4
	Study To Evaluate The Effect Of A Multiple Oral Dose Of PF-00232798 On QT Intervals In Healthy Subjects	NCT01140425		2010-07-01	2010-12-01	interventional, phase 1
	Magnesium Effect on Embryonal PR Interval	NCT03047304		2017-02-01	2018-02-01	interventional
	Antiarrythmic Drugs - Long-term Follow-up in the Modern Era	NCT01082055		2010-03-01	2016-03-01	observational (retrospective)
	Hemodynamic Responses to Tracheal Intubation Direct Laryngoscope and Videolaryngoscope in Elderly Patients	NCT02816775		2016-06-01	2016-10-01	interventional, phase 4
	A Phase 1 Study to Evaluate Effects of Sapropterin Dihydrochloride on QTc Intervals in Healthy Adult Subjects	NCT00789568		2008-10-01	2009-01-01	interventional, phase 1
	CARdiac Function Evaluation in Breast Cancer Patients	NCT03266809		2017-08-01	2020-02-01	observational (cohort, prospective)
	The Effect of Erythromycin on Occurrence of Leaks From Cervical Esophageal-Gastric Anastomosis After Trans-Hiatal Esophagectomy	NCT00373919		not provided	not provided	interventional
	Comparison of Two Macrolides, Azithromycin and Erythromycin, for Symptomatic Treatment of Gastroparesis	NCT01323582		2009-02-01	2012-12-01	interventional phase 2
	Prospective Analysis Of Cardiac Function In Cirrhotic Patients By Echocardiography And Its Correlation With Events	NCT01433848		2011-06-01	not provided	observational (cohort, prospective)
	General Anesthesia With ETT vs LMA in Patients Undergoing Ablation for Atrial Fibrillation	NCT02896595		2016-09-01	2018-12-01	interventional
	Effectiveness and Safety of Medical Treatment for SARS-CoV-2 (COVID-19) in Colombia	NCT04359095		2020-05-01	2020-10-01	interventional phase 2, phase 3
	Phase 2 Study of Quizartinib in Participants With Acute Myeloid Leukemia (AML) FLT3 Internal Tandem Duplication (FLT3/ITD) Mutation	NCT02984995		2016-12-01	2018-03-01	interventional phase 2
	Prevention of Atrial Fibrillation Following Esophagectomy	NCT00420017		2005-09-01	2008-11-01	interventional, phase 4
	A Study Evaluating Safety and Pharmacokinetics of ABBV-221 in Subjects With Advanced Solid Tumor Types Likely to Exhibit Elevated Levels of Epidermal Growth Factor Receptor	NCT02365662		2015-01-01	2018-03-01	interventional, phase 1
	Metoprolol Succinate in Cardiac Remodeling Related to Cirrhosis	NCT01676285		2012-01-01	2013-09-01	interventional, phase 3
	Multiple Dose Study to Evaluate the Safety of Multiple Doses of Denosumab 120 mg in Adults With Severe Chronic Kidney Disease (CKD) and CKD on Dialysis	NCT01464931		2011-11-01	2013-01-01	interventional, phase 1
	Intraoperative Volume Management and QT Interval	NCT02441751		2015-05-01	2021-06-01	observational (cohort, prospective)
	Evidence Based Evaluation and Acceptance of Donor Hearts for Transplantation	NCT02376387		2015-03-01	2020-06-01	observational (cohort, prospective)
	A Study of CAN008 for Newly Diagnosed Glioblastoma Multiforme	NCT02853565		2016-08-01	2018-09-01	interventional, phase 1
	Observational Study to Assess the Adequacy of Methadone Dosage, in Heroin Addicted Patients in a MMT.	NCT02062736		2010-02-01	2014-02-01	observational (cohort, prospective)
	Typical Daily Experiences, Ischemia and Repolarization in Coronary Artery Disease	NCT01531231		2012-01-01	2015-01-01	observational (cohort, prospective)
	Effects of Escitalopram on Autonomic Reactivity in Post Traumatic Stress Disorder	NCT01271244		2008-06-01	2013-06-01	interventional, phase 4
	A Study of LY2510924 and Durvalumab in Participants With Solid Tumors	NCT02737072		2016-09-01	2017-09-01	interventional, phase 1
	Introduction of Eurartesim® in Burkina Faso, Mozambique, Ghana and Tanzania	NCT02199951		2013-09-01	2014-08-01	observational (cohort, prospective)
	Effect of Antenatal SSRI Exposure on the QT Interval of Neonates	NCT02492347		2016-02-01	2017-08-01	interventional
	Comparison of Cardiotoxicity Induced by Selective Estrogen REceptor Modulators and aNti-Aromatase	NCT03259711		2001-01-01	2017-08-01	observational (case-only, retrospective)
	An Observational Safety Study in Zelboraf (Vemurafenib)-Treated Patients With BRAF-V600 Mutation-Positive Unresectable or Metastatic Melanoma (ZeSS)	NCT01990248		2013-03-01	2016-07-01	observational (cohort, prospective)
	STudy to vAlidate telemetRic ECG Systems for firsT Dose Administration of Fingolimod (START)	NCT01585298		2012-04-01	2016-12-01	interventional, phase 4
	DHA-PQP vs Chloroquine and Primaquine for Radical Cure of Vivax Malaria in Brazil	NCT03208907		2018-07-01	2019-12-01	interventional, phase 3
	Imaging of Brain Amyloid Plaques in the Aging Population	NCT00950430		2008-04-01	2023-04-01	interventional, phase 4
	Intravenous Haloperidol Versus Ondansetron for Treatment of Established Post-operative Nausea and Vomiting	NCT02143531		2008-09-01	2012-08-01	interventional, phase 4
	A Phase 3, Long-term, Extension Study of TVP-1012 (1 mg) in Early Parkinson's Disease Participants	NCT02337751		2015-07-01	2017-03-01	interventional, phase 3
	Hydroxychloroquine for Thrombosis Prevention and Antiphospholipid Antibody Reduction in Primary Antiphospholipid Syndrome	NCT04153201		2013-01-01	2019-10-01	interventional
	Haldol/Diphenhydramine Versus Metoclopramide/Diphenhydramine for Treatment of Acute Headache in the Emergency Department: A Randomized Controlled Trial	NCT02098499		2013-06-01	2014-02-01	interventional, phase 4
	Building Evidence for Advancing New Treatment for Rifampicin Resistant Tuberculosis (RR-TB) Comparing a Short Course of Treatment (Containing Bedaquiline, Delamanid and Linezolid) With the Current South African Standard of Care	NCT04062201		2019-08-01	2023-03-01	interventional, phase 3
	MEA112997 Open-label Long Term Extension Safety Study of Mepolizumab in Asthmatic Subjects	NCT01691859		2012-09-01	2017-05-01	interventional, phase 3
	Treatment With Tamoxifen in Cryptococcal Meningitis	NCT03112031		2017-10-01	2018-07-01	interventional phase 2
	Cardiac COVID-19 Health Care Workers	NCT04413071		2020-05-01	2020-06-01	observational (cohort, cross-sectional)
	First In Human Study With ABBV-CLS-579 When Given Alone Or In Combination With Programmed Cell Death-1 Inhibitor In Participants With Locally Advanced Or Metastatic Tumors	NCT04417465		2020-06-01	2023-04-01	interventional, phase 1
	Pragmatic Clinical Trial for a More Effective Concise and Less Toxic MDR-TB Treatment Regimen(s)	NCT02589782		2017-01-01	2020-06-01	interventional, phase 2/3
	Safety and Pharmacokinetics of Quinidine Alone and in Combination With Dabigatran Etexilate	NCT02171624		2009-03-01	2009-04-01	interventional, phase 1
	Pharmacokinetics and Safety of Moxifloxacin	NCT01329250		2011-05-01	2015-06-01	interventional, phase 4
	A Phase I, Multicenter Dose Escalation Study in Patients With Hairy Cell Leukemia	NCT00586924		2007-05-01	2015-05-01	interventional, phase 1
	Long-term Safety of SPD422 in Japanese Adults With Essential Thrombocythaemia	NCT01467661		2010-10-01	2015-05-01	interventional, phase 3
	A Safety and Efficacy Study of Eltrombopag in Subjects With AML	NCT01890746		2013-09-01	2015-03-01	interventional phase 2
	Vandetanib Risk Minimisation Effectiveness	NCT01757470		2012-06-01	2014-02-01	observational (cohort, prospective)
	A 12-Week Study To Assess The Safety Of Fluticasone Propionate/Salmeterol 100/50 Hydrofluoroalkane (HFA) Versus Fluticasone Propionate 100 HFA In Children With Asthma	NCT00441441		2007-02-01	2008-01-01	interventional, phase 3
	A Study to Evaluate the Safety and Antitumor Activity in Subjects With Advanced Solid Tumors	NCT01248949		2010-10-01	2015-07-01	interventional, phase 1
	Effect of Regulated Add -on Sodium Chloride Intake on Stabilization of Serum Lithium Concentration in Bipolar Disorder	NCT04222816		2020-01-01	2021-12-01	interventional, phase 4
	A Study of the Efficacy and Safety of MEDI-546 in Systemic Lupus Erythematosus	NCT01438489		2012-01-01	2015-04-01	interventional phase 2
	A Study to Evaluate Pazopanib in Comparison to Pemetrexed in Maintenance Setting in Non-progressing Subjects With Metastatic Stage IVA and IVB Non-squamous Non-small Cell Lung Cancer (NSCLC) Population	NCT01313663		2011-02-01	2012-07-01	interventional phase 2
	Special Investigation For Renal Cell Carcinoma (RCC) Of Sunitinib Malate (Regulatory Post Marketing Commitment Plan)	NCT00716625		2008-06-01	2015-10-01	observational (case-only, prospective)
	Special Investigation For Gist Of Sunitinib Malate (Regulatory Post Marketing Commitment Plan).	NCT00716820		2008-04-01	2015-10-01	observational (case-only, prospective)
	Phase II Study of Dasatinib (BMS-354825) for Androgen-deprived Progressive Prostate Cancer	NCT00385580		2007-01-01	2008-12-01	interventional phase 2
	Studies of a Candidate Aminoquinoline Antimalarial (AQ-13)	NCT01614964		2013-08-01	2016-01-01	interventional, phase 2
	Hydroxychloroquine Post-Exposure Prophylaxis for Coronavirus Disease (COVID-19) Among Health-Care Workers: A Randomized-Controlled Trial	NCT04438837		2020-06-01	2022-06-01	interventional
	A Phase 2A Evaluation of the Safety, Tolerability, Pharmacokinetics, Efficacy of Clofazimine (CFZ) in Cryptosporidiosis	NCT03341767		2017-12-01	2019-04-01	interventional, phase 2
	Case Collection Study to Determine the Accuracy, Call Back and Cancer Detection Rates of QT Ultrasound in Breast Imaging	NCT03052166		2017-04-01	2019-12-01	observational (cohort, prospective)
	Efficacy and Safety Study of Tafenoquine (TQ) Co-administered With Dihydroartemisinin-piperaquine (DHA-PQP) for the Radical Cure of Plasmodium Vivax (P. Vivax) Malaria	NCT02802501		2018-04-01	2019-08-01	interventional, phase 3
	Case Collection Study in the Evaluation of Doubling Time Rates in Non-Suspicious Breast Masses Using QT Ultrasound Technology	NCT03470051		2018-02-01	2020-03-01	observational (prospective)
	The Influences of Long Periods of Pneumoperitoneum and Head up Position on the Variation of Heart-rate Corrected QT Interval During Robotic-assisted Laparoscopic Gastrectomy - Observational Study	NCT02604979		2015-09-01	2016-02-01	observational (prospective)
	Sickle Cell Disease and CardiovAscular Risk - Red Cell Exchange Trial (SCD-CARRE)	NCT04084080		2020-02-01	2025-12-01	interventional, phase 3
	Study of AG-120 (Ivosidenib) vs. Placebo in Combination With Azacitidine in Patients With Previously Untreated Acute Myeloid Leukemia With an IDH1 Mutation	NCT03173248		2017-06-01	2021-10-01	interventional, phase 3
	A Phase 2a Study to Evaluate the Effects of Sirukumab in Subjects With Severe Poorly Controlled Asthma	NCT02794519		2016-09-01	2016-10-01	interventional, phase 2
	P Wave and QT Dispersion in Psoriasis	NCT02045485		2006-01-01	2006-06-01	observational (case-control, prospective)
	Long-term PK and Safety/Tolerability Testing LDLL600 Against Esmolol in Healthy Volunteers	NCT01741519		2012-12-01	2013-01-01	interventional, phase 1
	A Phase I Study to Assess the Safety, Pharmacokinetics, and Potential Effects of Amrubicin on the QT/QTc Interval in Cancer Patients With Advanced Solid Tumors.	NCT00915083		2009-06-01	2011-05-01	interventional, phase 1
	Trial of Intravenous Azithromycin to Eradicate Ureaplasma Respiratory Tract Infection in Preterm Infants	NCT01778634		2013-07-01	2016-12-01	interventional phase 2
	Study of DA-9501 In Pediatric Subjects In The Intensive Care Unit	NCT02757625		2016-07-01	2017-05-01	interventional, phase 3
	A Long-term Safety and Efficacy of EnXtra (E-AG-01) in Healthy Adults	NCT03731286		2018-11-01	2019-08-01	interventional
	Methadone-Induced QT Interval Prolongation in a Narcotic Treatment Center	NCT02898337		2016-11-01	2020-06-01	observational (cohort)
	Ventricular Repolarization in Patients With Premature Ovarian Insufficiency (QT-IOP)	NCT04167033		2020-06-01	2023-08-01	interventional
	Effects of OMACOR in patients with a cardiac sodium channel gene SCN5A mutation, one variant of the congenital long-QT syndrome. A proof of concept study.		2009-011819-20	2009-10-01	2010-05-01	interventional
	Genetic characterization of drug-induced Long QT Syndrome		2018-000564-28	2018-03-01	ongoing	no results available
	Repolarization study in LQTS patients		2017-005082-47	2018-01-01	ongoing	no results available
	Hydroxychloroquine as an anti-autophagy and chromatin modulating drug in combination with erlotinib in non-small cell lung cancer (NSCLC) patients: a single-center single arm open-label phase II trial		2011-004903-20	2012-05-01	ongoing	no results available
	Refeeding risks in patients requiring nutrition support. A twin centre double-blind randomised controlled trial of parenteral nutrition support		2007-005547-17	2010-01-01	ongoing	no results available
	A Phase 2, Dose-Finding, Randomized, Parallel-Group, Double-Blind, Placebo-Controlled Study, Evaluating the Safety and Efficacy of Pridopidine 45 mg, 67.5 mg, 90 mg, and 112.5 mg Twice-Daily versus...		2013-001888-23	2014-01-01	2016-07-01	interventional phase 2
	A phase 1/2, Open-Label, Safety, Pharmacokinetic and Efficacy Study of Ascending Doses of Oral CK-101 in Patients with Advanced Solid Tumors		2017-001265-24	2017-11-01	ongoing	no results available
	Large, Simple Trial Comparing Two Strategies for Management of Anti-Retroviral Therapy (The SMART Study)		2004-000441-38	2005-04-01	prematurely ended	no results available
	Minimizing Adverse haemmhorragic events by Transradial access site and systemic Implementation of angioX (MATRIC)		2011-000430-11	2011-10-01	ongoing	no results available
	Biological Medicine for Diffuse Intrinsic Pontine Glioma (DIPG) Eradication		2014-001929-32	2016-01-01	ongoing	no results available
	A Single-Blind, Multicenter, Placebo-Controlled, Sequential Design Study Evaluating the Potential Effects of a Single-Dose Administration of Trabectedin on the QT Intervals of the Electrocardiogram		2008-004967-21	2008-10-01	2009-12-01	interventional
	Effects of early clozapine treatment on remission rates in acute schizophrenia (EARLY)		2018-001514-15	2018-12-01	ongoing	no results available
	Phase I/II study on concomitant and adjuvant Temozolomide and Radiotherapy with or without PTK787/ZK222583 in newly diagnosed GBM		2004-003896-35	2005-08-01	2008-09-01	interventional, phase 1/2
	Management of Transformed Chronic myeloid leukaemia: Ponatinib and Intensive chemotherapy: a dose finding study		2012-005629-65	2014-01-01	ongoing	no results available
	An International, Randomised, Double-Blind, Two-Arm Study to Evaluate the Safety and Efficacy of Vandetanib 150 and 300mg/Day in Patients with Unresectable Locally Advanced or Metastatic Medullary Thyroid Cancer		2011-004701-24	2012-03-01	ongoing	no results available
	A 12-Week, Open-Label Extension Study of Lurasidone (SM-13496) in Subjects with Schizophrenia		2016-000061-23	2017-03-01	2019-01-01	interventional
	A Phase 1/2, Open-Label, Safety, Pharmacokinetic and Preliminary Efficacy Study of Oral CO-1686 in Patients with Previously Treated Mutant EGFR Non-small Cell Lung Cancer (NSCLC)		2011-005215-86	2013-05-01	2018-08-01	interventional, phase 1/2
	A Double-blind, Placebo-Controlled, Randomized Withdrawal Following Open-label Therapy Study to Assess the Safety and Efficacy of Levoketoconazole (2S,4R-ketoconazole) in the Treatment of Endogenous...		2017-001219-35	2018-01-01	ongoing	no results available
	A Single Blind, Randomized, Placebo Controlled, Repeat Dose, Dose Escalating Study Investigating Safety, Tolerability pharmacokinetics, Pharmacodynamics and the Beta-Cell Preserving Effect of Otelixizumab in New-Onset, Autoimmune Type 1 Diabetes Mellitus Patients		2013-003296-34	2014-01-01	2018-09-01	interventional
	EMPOWER: EMesis in Pregnancy - Ondansetron With mEtoclopRamide		2017-001651-31	2017-11-01	ongoing	no results available
	A Phase 2/3, Randomized, Double-Blind, Placebo-Controlled Study to Evaluate the Effect of GS-6615 on Exercise Capacity in Subjects with Symptomatic Hypertrophic Cardiomyopathy		2013-00429-97	2015-03-01	2017-02-01	interventional, phase 2/3
	A Multicenter Phase 2 Study of Single-agent Filanesib (ARRY-520) in Patients With Advanced Multiple Myeloma		2014-001051-23	2014-10-01	2017-09-01	interventional, phase 2
	Un estudio de fase II de tamibaroteno en pacintes con leucemia promielocítica aguda que hayan recibido terapia previa can ATRA y tióxiso de arsénico (STAR-1)		2007-002183-99	2007-09-01	ongoing	no results available
	A Phase 1/2, Open-label Study Evaluating the Safety, Tolerability, Pharmacokinetics, Pharmacodynamics, and Efficacy of AMG 510 Monotherapy in Subjects With Advanced Solid Tumors with KRAS p.G12C mutations		2018-001400-11	not available	not available	no results available
	Randomised, controlled clinical study regarding the feasibility of converting opiate dependents from methadone substitutes to slow release morphine sulphage (sevre-long)		2008-002185-60	2009-07-01	2011-06-01	interventional
	A Phase 2, Randomized, Open-Label Study of the Safety and Efficacy of Two Doses of Quizartinib (AC220; ASP2689) in Subjects with FLT3-ITD Positive Relapsed or Refractory Acute Myeloid Leukaemia (AML)		2011-005408-13	2012-09-01	2015-03-01	interventional, phase 2
	Phase 2, open-label single arm study of the efficacy and safety of PF 02341066 in patients with advanced non-small cell lung cancer (NSCLC) harboring a translocation or inversion involving the anap...		2009-012504-13	2010-01-01	2015-12-01	interventional, phase 2
	A single arm, open-label, Phase 2 study evaluating the efficacy, safety and pharmacokinetics of HM61713 in patients with T790M-positive non-small cell lung cancer (NSCLC) after treatment with an ep...		2015-001435-21	2015-10-01	ongoing	no results available
	A phase I/II Multi-centre Study of AZD8931 in Combination with Weekly Paclitaxel to Assess the Safety, Tolerability, Pharmacokinetics and Efficacy in Patients with Advanced Solid Tumours and in a S...		2009-010551-26	2009-08-01	2015-02-01	interventional, phase 1/2
	A 52-week open-label extension study of the long-term safety and efficacy of rosiglitazone extended-release (RSG XR) as adjunctive therapy to acetylcholinesterase inhibitors in subjects with mild-to-moderate Alzheimer disease		2006-004152-20	2007-11-01	2009-05-01	interventional, phase 3
	Phase 3, randomized, open-label study of the efficacy and safety of PF 02341066 versus standard of care chemotherapy (pemetrexed or docetaxel) in patients with advanced non-small cell lung cancer (NSCLC) harboring a translocation or inversion event involving the analplastic lymphoma kinase (ALK) gene locus		2009-012595-27	2010-01-01	2016-01-01	interventional, phase 3
	A Phase 3, Randomized, Controlled, Double Blind, Multinational Clinical Study of the Efficacy and Safety of Vosaroxin and Cytarabine Versus Placebo and Cytarabine in Patients With First Relapsed or...		2010-021961-61	2011-05-01	ongoing	no results available
	A Single-Centre, Double-blind, Double-dummy, Randomised, Placebo Controlled, Four Period Crossover Study to Assess the Effect of Single Oral Doses of AZD5672 (600mg and 150mg) on QT/QTc Interval, C.		2009-011044-20	2009-04-01	2009-07-01	interventional
	Clinical Utility of Liquid Biopsy as a tool to assess the evolution of brigatinib treated patients with non-small cell lung cancer with EML4-ALK translocation: an exploratory study		2019-002369-36	2020-04-01	ongoing	no results available
	A randomised, double-blind, placebo-controlled, 4-way crossover clinical trial to assess the efficacy, safety, tolerability and pharmacokinetics of single doses of LAS100977 administered by inhalat...		2008-004756-69	2008-01-01	2009-03-01	interventional
	A Placebo Controlled, Randomized, Double-Blind, Fixed-dose, Multicenter, Phase IIb Study to Investigate the Efficacy and Tolerability of BAY 58-2667 (150 µg/h, 100 µg/h, 50 µg/h) Given Intravenousl...		2009-014377-40	2010-01-01	2011-02-01	interventional phase 2b
	A Randomised, Placebo-controlled, Double-blind, Parallel-group, Multicentre, Phase IIa Study to Explore the Relationship between QTcF Interval at First Dose (Loading Dose) and at Steady State after...		2007-007058-79	2008-01-01	2008-08-01	interventional phase 2a
	A Placebo Controlled, Randomized, Double-Blind, Fixed-dose, Multicenter, Phase IIb Study to Investigate the Efficacy and Tolerability of Low Dose BAY 58-2667 (25 μg/h, 10 μg/h) Given Intravenously ...		2009-014378-16	2010-01-01	2010-11-01	interventional phase 2b
	A PHASE IIa, RANDOMISED, DOUBLE-BLIND, MULTIPLE DOSE, PLACEBO CONTROLLED, 3 PERIOD CROSS-OVER, ASCENDING DOSE CLINICAL TRIAL TO ASSESS THE EFFICACY, SAFETY, TOLERABILITY AND PHARMACOKINETICS OF THR...		2008-003732-38	2009-09-01	2008-12-01	interventional phase 2a
	A multicentre, open-label, extension study, evaluating the safety and tolerability and the efficacy of ADV7103 at long term in distal renal tubular acidosis patients.		2013-003828-36	2015-10-01	ongoing	no results available
	A Randomised, Multi-centre, Double-blind, Double-dummy, two way cross-over, twelve weeks noninferiority study to evaluate the efficacy, safety and tolerability of combination dry powder Fluticasone...		2015-004893-14	2016-08-01	2015-01-01	interventional
	An Extension Protocol For Multiple Sclerosis Patients Who Participated in Genzyme-Sponsored Studies of Alemtuzumab		2009-010788-18	2009-07-01	2016-02-01	interventional
	A Phase 3 Multicenter Open-label Study of Brigatinib (AP26113) versus Crizotinib in Patients with ALK-positive Advanced Lung Cancer		2015-003447-19	2016-06-01		no results available
	A Phase 2 Study to Assess the Antiarrhythmic and Symptomatic Effect of the Second Generation Antisense Oligonucleotide ISIS 329993 Targeting CRP in Patients with Paroxysmal Atrial Fibrillation		2012-000833-38	2012-06-01	2014-03-01	interventional phase 2
	A Phase II, Open Label, Single-arm Study to Assess the Safety and Efficacy of AZD9291 in Patients with EGFRm+/T790M+, Locally Advanced or Metastatic NSCLC who have Progressed Following Prior Therap...		2014-000531-17	2014-05-01	ongoing	no results available
	Bivalirudin versus Heparin in NST and ST-Evaluation myocardial infarction on modern antiplatelet therapy in SWEDEHEART (the VALIDATE - SWEDEHEART-trial)		2012-005260-10	2013-02-01	2017-03-01	interventional
	Double-blind, placebo-controlled, randomized, parallel-group Phase II study in subjects with relapsing forms of multiple sclerosis (MS) to evaluate the safety, tolerability, and effects of two dose...		2006-002204-33	2007-03-01	2010-07-01	interventional phase 2
	Assessment of incidence of adverse events in a naive pediatric population treated with an antipsychotic drug over 12 months follow-up		2012-004546-15	not available	not available	no results available
	A Placebo Controlled, Randomized, Double-Blind, Fixed-dose, Multicenter, Phase IIb Study to Investigate the Efficacy and Tolerability of BAY 58-2667 (50 μg/h, 100 μg/h, 150 μg/h) Given Intravenousl...		2009-017082-39	2010-02-01	2011-03-01	interventional phase 2b
	Combined Randomized, Double-Blind, Dose-Confirming Phase 3a Study in Parallel Design to Assess the Efficacy and Safety of Topical 4-Week Treatment With 1% GPB Cream vs Placebo and Open-Label Phase...		2017-004534-28	2018-08-01	ongoing	no results available
	A Multicenter Single-arm Extension Study to Characterize the Long-term Safety of Cinacalcet Hydrochloride in the Treatment of Secondary Hyperparathyroidism in Pediatric Subjects With Chronic Kidn...		2014-003563-38	2015-04-01	2017-03-01	interventional
	A Multicenter, Randomized, Double-Blind, Placebo-Controlled, Phase III Study of ARN-509 in Men with Non-Metastatic (M0) Castration-Resistant Prostate Cancer		2012-004322-24	2013-08-01	ongoing	no results available
	A Phase 3, Dose-Escalating Study in Children With Hyperkalaemia Between Birth and <18 Years of Age to Evaluate Increasing Doses of Sodium Zirconium Cyclosilicate (SZC) Given Three Times Daily for t...		2018-001331-48	2019-03-01	ongoing	no results available
	Etude ATOLL . Etude internationale, multicentrique, visant à comparer l'utilisation de l'enoxaparine IV versus héparine standard IV chez les sujets présentant un infarctus du myocarde aigu et néces...		2007-007676-42	2008-04-01	ongoing	no results available
	A Phase 2 Proof-of-Concept, Multicenter, Randomized, Double-blind, Placebo-controlled Study to Evaluate the Safety, Tolerability, Pharmacokinetics, Pharmacodynamics and Efficacy of Pomalidomide (CC...		2010-023047-15	2012-03-01	2016-11-01	interventional phase 2
	A Phase 2b, Randomized, Double-Blind, Placebo-Controlled Trial Evaluating 16 and 24 Weeks of a Four-Drug Regimen and 24 Weeks of a Three-Drug Regimen of GS-9451, Peginterferon Alfa 2a (PEG, Pegasys...		2010-023952-10	2011-06-01	2013-09-01	interventional phase 2b
	Treatment with Liraglutide in type 1 diabetic patients. Effects on glycemic control and counterregulation and cognitive performance during hypoglycaemia.		2012-002526-67	2012-07-01	ongoing	no results available
	A Phase 2a, Randomized, Double-Blind, Placebo-Controlled Trial to Evaluate the Safety, Tolerability and Efficacy of Intravenous Bendavia™ (MTP-131) on Reperfusion Injury in Patients Treated with St...		2011-002824-42	2012-04-01	ongoing	no results available
	Randomized, Double-Blind, Placebo-Controlled, 4-Way Crossover Study to Evaluate the Safety, Tolerability and Effect on Atrial Fibrillation Burden of BMS-914392 in Patients with Paroxysmal Atrial Fi...		2010-022947-39	2011-03-01	2012-06-01	interventional
	A double-blind randomized extension study to assess the long-term efficacy and safety of linzagolix in subjects with endometriosis-associated pain.		2019-002410-39	2020-04-01	ongoing	no results available
	A three-month, double-blind, double dummy, parallel group, controlled study comparing the efficacy and safety between 12 µg twice daily of Formoterol-HFA and 12 µg twice daily of Formoterol-DPI (Fo...		2004-000755-41	2004-09-01	2005-06-01	interventional
	A Phase 2, Double-Blind, Randomized, Placebo Controlled, Dose Ranging, Parallel Group Study to Evaluate the Effect of GS-6615 on Ventricular Arrhythmia in Subjects with Implantable Cardioverter-Def...		2013-004430-15	2014-10-01	2016-10-01	interventional
	CXCR4 Antagonism for Cell Mobilisation and Healing in Acute Myocardial Infarction (CATCH-AMI) A Phase IIa, Double-Blind, Placebo-Controlled, Randomised, Multi-centre Study of POL6326, a CXCR4 A...		2012-003229-91	2013-06-01	2016-08-01	interventional
	A 12-Week, Open-Label Extension Study of Lurasidone (SM-13496) in Subjects with Schizophrenia		2016-000061-23	2017-03-01	2019-01-01	interventional
	A Phase 2b, Randomized, Double-Blind, Placebo-Controlled Trial Evaluating 16 and 24 Weeks of Response Guided Therapy With GS-9190, GS-9256, Ribavirin (Copegus®) and Peginterferon Alfa 2a (Pegasys®)...		2010-020911-35	2011-01-01	2013-09-01	interventional
	Randomised Open Label Adaptive Phase III trial of addition of Belinostat to chemotherapy in patients with locally advanced potentially resectable Thymic Epithelial Tumors (TET)		2017-002561-21	2018-02-01	ongoing	no results available
	A Phase 3, Matrix Design, Partially Double-Blind, Randomized Study of the Efficacy and Safety of 50 mg Lonafarnib/100 mg Ritonavir BID with and without 180 mcg PEG IFN-alfa-2a for 48 Weeks Compared...		2018-003167-54	2019-05-01	ongoing	no results available
	A Phase IIa, randomised, double blind, placebo controlled, three way crossover study to assess the pharmacokinetics of RPL554 administered to adult patients with Cystic Fibrosis.		2015-004263-36	2016-12-01	2017-11-01	interventional
	Phase IIIb randomized trial comparing irradiation plus long term adjuvant androgen deprivation with GnRH antagonist versus GnRH agonist plus flare protection in patients with very high risk localiz...		2015-005098-19	2017-09-01	ongoing	no results available
	A Phase 2/3, Randomized, Double-Blind, Placebo-Controlled Study to Evaluate the Effect of GS-6615 on Exercise Capacity in Subjects with Symptomatic Hypertrophic Cardiomyopathy		2013-004429-97	2015-03-01	2017-02-01	interventional
	A RANDOMIZED PHASE 2 STUDY OF PF-05212384 PLUS IRINOTECAN VERSUS CETUXIMAB PLUS IRINOTECAN IN PATIENTS WITH KRAS AND NRAS WILD TYPE METASTATIC COLORECTAL CANCER		2013-002095-40	2014-06-01	2016-04-01	interventional
	An open-label, randomised, multicentre, phase III study of irinotecan liposome injection, oxaliplatin, 5-fluorouracil/leucovorin versus nab-paclitaxel plus gemcitabine in subjects who have not prev...		2018-003585-14	2020-04-01	ongoing	no results available
	Phase II, open-label, single arm, multicenter study of encorafenib, binimetinib plus cetuximab in subjects with previously untreated BRAF V600E -mutant Metastatic Colorectal Cancer		2018-000271-32	2018-10-01	ongoing	no results available
	An Open-Label, Randomized, Phase 3 Study of Inotuzumab Ozogamicin (CMC-544) Administered in Combination With Rituximab Compared to a Defined Investigator’s Choice Therapy in Subjects With Relapsed ...		2007-000219-27	2008-04-01	2011-04-01	interventional
	A Randomized multicenter phase III trial comparing enzalutamide vs. a combination of Ra223 and enzalutamide in asymptomatic or mildly symptomatic castration resistant prostate cancer patients metas...		2014-001787-36	2015-09-01	ongoing	no results available
	A Phase IIIb, Double-Blind, Placebo-Controlled, Multicenter, Parallel Group, Extension Trial to Evaluate the Safety and Tolerability of Oral Cladribine in Subjects with Relapsing-Remitting Multiple...		2007-000381-20	2007-11-01	2012-02-01	interventional phase 3
	A Phase 1 Study of the EZH2 Inhibitor Tazemetostat in Pediatric Subjects with Relapsed or Refractory INI1-Negative Tumors or Synovial Sarcoma		2015-002468-18	2016-02-01	ongoing	no results available
	A phase II, randomised, double blind, placebo controlled, six way crossover study to assess the bronchodilator effect of RPL554 administered on top of salbutamol and ipratropium in patients with COPD		2015-002536-41	2015-09-01	2015-12-01	interventional
	A phase II, randomised, double blind, placebo controlled, three way crossover study to assess the bronchodilator effect of RPL554 administered in addition to open label tiotropium in patients with ...		2016-004450-15	2017-01-01	2017-07-01	interventional
	A PHASE II, RANDOMISED, DOUBLE BLIND, PLACEBO CONTROLLED, THREE WAY CROSSOVER STUDY TO ASSESS THE BRONCHODILATOR EFFECT OF RPL554 ADMINISTERED IN ADDITION TO OPEN LABEL TIOTROPIUM/OLODATEROL IN PAT...		2018-001037-41	2018-09-01	2018-11-01	interventional
	A Phase II, Multicenter Study of the EZH2 Inhibitor Tazemetostat in Adult Subjects with INI1-Negative Tumors or Relapsed/Refractory Synovial Sarcoma		2015-002469-41	2016-04-01	ongoing	no results available
	A Phase I/IIa Trial With BMS-986158, a Small Molecule Inhibitor of the Bromodomain and Extra-Terminal (BET) Proteins, in Subjects with Selected Advanced Solid Tumors		2015-000324-29	2016-09-01	ongoing	no results available
	A Phase 3, Randomized, Double Blind, Placebo Controlled, 12 Week Study to Assess the Efficacy and Safety of Etrasimod in Subjects with Moderately to Severely Active Ulcerative Colitis		2018-003986-33	2019-07-01	ongoing	no results available
	Microarray In Node negative and 1 to 3 positive lymph node Disease may Avoid ChemoTherapy. A prospective, randomised study comparing the 70-gene expression signature with common clinical-pathologi...		2005-002625-31	2006-12-01	ongoing	no results available
	A Phase 3 Clinical Study to Investigate the Prevention of Relapse in Lymphoma Using Daily Enzastaurin		2005-004630-41	2006-04-01	2013-07-01	interventional

## Sheet: screened full-text
	Title	US study number	EU study number	study start date	study end date	study type	ECG measured?
	Measurement of the Electromechanical Window to Improve the Diagnosis of Congenital Long QT Syndrome	NCT04328378		2020-05-01	2022-05-01	interventional	yes
	Long QT Syndrome Screening in Newborns	NCT02412709		2015-06-01	2016-12-01	interventional, phase 2	yes
	Prevalence of Congenital Long QT Syndrome and Acquired QT Prolongation in a Hospital Cohort	NCT03544918		2015-06-01	2018-12-01	observational	yes
	Prospective Identification of Long QT Syndrome in Fetal Life	NCT02876380		2014-11-01	2020-12-01	observational	no
	The Canadian National Long QT Syndrome Registry	NCT02425189		2014-11-01	2025-12-01	observational	yes
	The Long QT Syndrome in Pregnancy	NCT00488254		2007-06-01	2011-04-01	observational (cohort, retrospective)	not specified
	Effect of Eleclazine on Shortening of the QT Interval, Safety, and Tolerability in Adults With Long QT Syndrome Type 3	NCT02300558	2014-000042-30	2014-12-01	2016-12-01	interventional, phase 3	yes
	Effect of Grapefruit on QT Interval in Healthy Volunteers and Patients With Congenital Long QT Syndrome	NCT02680080		2016-12-01	2018-06-01	interventional	yes
	Multicenter Evaluation of Children and Young Adults With Genotype Positive Long QT Syndrome	NCT01705925		2012-03-01	2018-12-01	observational (cohort)	yes
	Effect of Oral GS-6615 on Dofetilide-Induced QT Prolongation, Safety, and Tolerability in Healthy Adults	NCT02365532		2015-02-01	2015-05-01	interventional, phase 1	yes
	Abnormal QT-Response to the Sudden Tachycardia Provoked by Standing in Individuals With Drug-induced Long QT Syndrome	NCT02581241		2016-01-01	2017-08-01	interventional	yes
	Long Term Prophylactic Therapy of Congenital Long QT Syndrome Type III (LQT3) With Ranolazine	NCT01728025		2012-10-01	2017-11-01	interventional, phase 2	yes
	KCNQ1 Cascade Screening	NCT03783975		2019-03-01	2020-08-01	interventional	no
	Study of the Effect of GS-6615 in Subjects With LQT-3	NCT01849003		2013-05-01	2014-11-01	interventional, phase 1	yes
	Novel Form of Acquired Long QT Syndrome	NCT04169100		2011-09-01	2024-03-01	interventional, phase 4	yes
	Comparison Between Epinephrine and Exercise Test in QT Long Syndrome Patients	NCT01745666		2012-05-01	2018-05-01	interventional	yes
	QT-prolongation in Psychiatric Hospitals	NCT02043925		2010-10-01	2015-03-01	observational (cohort, prospective)	yes
	Determine the Incidence of Long QT Amongst a Large Cohort of Subjects Diagnosed With Unilateral or Bilateral Sensorineural Hearing Loss.	NCT02082431		2014-08-01	2019-12-01	observational (cohort, prospective)	yes
	Genetics of QT Prolongation With Antiarrhythmics	NCT02439658		2015-05-01	2018-08-01	observational (case-control, prospective)	yes
	Drug Interactions With Risk of QT-prolongation in a General Hospital	NCT02043912		2013-07-01	2014-02-01	observational (cohort, prospective)	yes
	Pharmacokinetics of Eleclazine in Adults With Normal and Impaired Hepatic Function	NCT02412098		2015-03-01	2016-04-01	interventional, phase 1	no
	Electromechanical Profiling of the Long-QT Syndrome (LQTS)	NCT04074122		2020-01-01	2022-01-01	observational (case-control, prospective)	no
	Efficacy Study of Sodium Channel Blocker in LQT3 Patients	NCT01648205		2012-09-01	2020-07-01	interventional, phase 2	yes
	Long QT Syndrome and Sleep Apnea	NCT03678311		2019-03-01	2019-04-01	interventional	yes
	Exercise in Genetic Cardiovascular Conditions	NCT02549664		2015-05-01	2021-12-01	observational (cohort, prospective)	no
	Influence of Testosterone Administration on Drug-Induced QT Interval Prolongation and Torsades de Pointes	NCT02513940		2015-08-01	2019-03-01	interventional, phase 4	yes
	Metabolism of Patients With Genetically Caused Cardiac Arrhythmia	NCT02775513		2010-09-01	2016-05-01	observational (case-control, cross-sectional)	no
	Pharmacokinetics of Eleclazine in Adults With Normal and Impaired Renal Function	NCT02441829		2015-05-01	2015-12-01	interventional, phase 1	no
	Hydroxyzine and Risk of Prolongation of QT Interval	NCT02814981		2015-11-01	2017-08-01	observational (cohort, prospective)	yes
	Long QT Syndrome-Population Genetics and Cardiac Studies	NCT00005176		1985-08-01	2013-04-01	observational (prospective)	yes
	Risk of QT-prolongation and Torsade de Pointes in Patients Treated With Acute Medication in a University Hospital	NCT02068170		2014-02-01	2015-03-01	observational (cohort, prospective)	yes
	Effect of Beta-blocker Therapy on QTc Response in Exercise and Recovery in Normal Subjects	NCT00588965		2007-08-01	2008-12-01	interventional	yes
	Exploring Mechanisms and Morphology of QT Interval Prolongation	NCT03291145		2017-06-01	2018-06-01	interventional	yes
	Study Evaluating the Effects of Multiple Oral Doses of ERB-041 on Cardiac Repolarization in Healthy Subjects	NCT00316459		2006-05-01	2007-04-01	interventional, phase 1	yes
	Reducing the Risk of Drug-Induced QT Interval Lengthening in Women	NCT03834883		2019-03-01	2022-06-01	interventional, phase 4	yes
	The Physiological Effects of Human Ether-a-go-go-Related Gene (hERG)Blockade on Metabolism	NCT03868657		2019-01-01	2019-09-01	interventional	yes
	Continuous Versus Intermittent cARdiac Electrical moNitorinG	NCT04336644		2020-08-01	2022-09-01	interventional	yes
	A Registry to Determine the Clinical and Genetic Risk Factors for Torsade De Pointes	NCT02439645		2015-05-01	2025-10-01	observational (case-only, prospective)	yes
	Effect of Eleclazine on QT, Safety, and Tolerability in Adults With Long QT2 Syndrome	NCT02365506		2015-07-01	2016-05-01	interventional, phase 1	yes
	Effect of Methadone and Hydromorphone on the QT Interval After Anesthesia and Surgery	NCT03893734		2018-05-01	2020-08-01	interventional, phase 4	yes
	QT-Prolongation in Lung Transplantation	NCT02380365		2015-04-01	2016-04-01	observational (cohort, prospective)	yes
	Effects Rapid Atrial Pacing Has on the Electrocardiogram (ECG) in Patients With Dual Chamber Pacemakers	NCT00883610		2009-04-01	2012-06-01	observational (cohort, prospective)	yes
	ECG Signal Collection From Long QT Syndrome, Wide QRS Complexes, Heart Failure, and Cardiac Resynchronization Patients	NCT00399412		2006-11-01	2007-12-01	observational (cohort, prospective)	yes
	Fetal and Neonatal Magnetophysiology	NCT01903564		2014-03-01	2016-06-01	observational (cohort, prospective)	yes
	Race Difference Moxifloxacin-induced QT Prolongation Between Healthy Chinese and Caucasian Volunteers	NCT02119091		2014-04-01	2014-06-01	interventional, phase 1	yes
	Does Azithromycin Cause QT Prolongation in Hospitalized Patients With Severe Community Acquired Pneumonia?	NCT01553734		2012-03-01	2013-05-01	observational (cohort, prospective)	yes
	Prevelance of Fragmented QRS Complex and Prolonged QT Interval in Cirrhotic Patients	NCT03158701		2017-06-01	2018-06-01	observational (cohort, prospective)	yes
	Worm Study: Modifier Genes in Sudden Cardiac Death	NCT02014961		2015-04-01	2025-04-01	interventional	yes
	CiPA Phase 1 ECG Biomarker Validation Study	NCT03070470		2017-03-01	2017-06-01	interventional, phase 1	yes
	Ability of Late Sodium or Calcium Current Block to Balance the ECG Effects of Potassium Current Block	NCT02308748		2014-05-01	2014-06-01	interventional, phase 1	yes
	Linkage Study of Long QT Syndrome In An Amish Kindred	NCT00005250		1990-01-01	not provided	observational	yes
	Influence of Progesterone Administration on Drug-Induced QT Interval Lengthening	NCT01929083		2013-04-01	2014-06-01	interventional, phase 2	yes
	Molecular Genetic Screening and Identification of Congenital Arrhythmogenic Diseases	NCT00221832		2003-10-01	2011-12-01	observational (prospective)	yes
	Derivation of Human Induced Pluripotent Stem (iPS) Cells to Heritable Cardiac Arrhythmias	NCT02413450		2013-08-01	2023-08-01	observational (prospective)	no
	Safety of Local Dental Anesthesia in Patients With Cardiac Channelopathies	NCT03182777		2015-05-01	2018-08-01	interventional	yes
	Long Term Monitoring for Risk of Sudden Death	NCT04124237		2015-05-01	2020-01-01	observational (cohort, prospective)	yes
	Epidemiology of Long QTand Asian Sudden Death in Sleep	NCT00005367		1993-02-01	not provided	observational	yes
	Ramosetron Pre-treatment for PONV and QT Prolongation	NCT03278522		2017-07-01	2018-02-01	interventional, phase 4	yes
	Pediatric Lead Extractability and Survival Evaluation (PLEASE)	NCT00335036		2006-06-01	2009-01-01	interventional	no
	Hearts in Rhythm Organization (HiRO)National Registry and Bio Bank	NCT04189822		2019-08-01	2025-12-01	observational (prospective)	yes
	Drug-induced Repolarization ECG Changes	NCT03642405		2018-08-01	2019-09-01	observational (cohort, prospective)	yes
	Fetal Electrophysiologic Abnormalities in High-Risk Pregnancies Associated With Fetal Demise	NCT03775954		2018-07-01	2022-04-01	observational (cohort, prospective)	yes
	Registry of Unexplained Cardiac Arrest	NCT00292032		2004-05-01	2021-01-01	observational (cohort, prospective)	yes
	Selections of Subjects With Important Changes in Their Cardiac Repolarization Parameters for the Procurement of Skin and Blood Samples	NCT01338441		2011-03-01	2011-05-01	interventional, phase 1	yes
	5-HT3 Antagonists (Antiemetics) and Cardiac Safety	NCT02436798		2014-06-01	2020-07-01	observational (prospective)	yes
	The Effect of General Anesthesia on the Risk for Arrhythmia	NCT01174251		2010-12-01	2013-04-01	observational (cohort, prospective)	yes
	CIQTP Prolongation : Role and Mechanism in Sudden Cardiac Death	NCT03387072		2018-03-01	2021-03-01	observational (case-control, prospective)	yes
	Evaluation of Possible Effects on the QT/ QTc Interval of Rupatadine in Healthy Volunteers	NCT00199225		2005-02-01	not provided	interventional, phase 1	yes
	China Inherited Ventricular Arrhythmias Registry	NCT03880708		2017-10-01	2022-10-01	observational (cohort, prospective)	yes
	The Effect of Energy Drink on Cardiovascular Variables: A Randomized Controlled Trial	NCT03841838		2019-02-01	2019-05-01	interventional	yes
	Low-dose Epinephrine Infusion Tests in Adolescent and Pediatric Patients	NCT00548886		2008-02-01	2012-01-01	interventional	yes
	A Study to Investigate the Effect of Single Dose of AZD6094 (600 mg) on Cardiac Repolarization in Healthy Volunteers	NCT03258515		2017-09-01	2018-03-01	interventional, phase 1	yes
	Genetic Sources of Variability of the Adaptation of the Ventricular Repolarisation	NCT00773201		2008-02-01	2012-03-01	interventional, phase 1	yes
	Infant Medical Records: Case Report Proposal	NCT00268060		2004-09-01	terminated	observational (retrospective)	yes
	Ondansetron and the QT Interval In Adult Emergency Department Patients	NCT01759420		2012-12-01	2014-05-01	observational (cohort, prospective)	yes
	Effect of Potassium and Acetazolamide on People With Andersen-Tawil Syndrome	NCT00839501		2008-12-01	2011-01-01	interventional, phase 1	yes
	Characteristics of Andersen-Tawil Syndrome	NCT00521794		2007-11-01	2012-10-01	observational (cohort, prospective)	yes
	Methadone Pharmacokinetics and Cardiac Effects in Newborns	NCT00715988		2007-10-01	2012-09-01	interventional, phase 1	yes
	Genetic Markers of Cardiovascular Disease in Epilepsy	NCT02824822		2016-05-01	2020-05-01	observational (prospective)	no
	A Dose Ranging Escalation Study of Tramadol Hydrochloride in Healthy Volunteers	NCT01947920		2013-08-01	2013-11-01	interventional, phase 1	yes
	Renal Nerve Stimulation and Renal Denervation in Patients With Sympathetic Ventricular Arrhythmias	NCT02856373		2015-03-01	2020-05-01	interventional, phase 2	no
	Cortisone and QTc-Interval	NCT03082339		2017-04-01	2020-04-01	observational (cohort, prospective)	yes
	Exercise Induced QT Interval Changes in Response to Intermittent and Continuous Graded Exercise Tests	NCT04005027		2019-07-01	2021-09-01	interventional	yes
	Effect of a Multiple-dose Oral Administration of CG5503 PR on the Electrical Activity of the Heart in 48 Healthy Men and Women	NCT03951402		2003-03-01	2003-08-01	interventional, phase 1	yes
	Azithromycin Added to Hydrochloroquine in Patients Admitted to Intensive Care With COVID-19: Randomised Controlled Trial	NCT04339816		2020-05-01	2021-12-01	interventional, phase 3	no
	Distribution of Cell-cell Junction Proteins in Arrhythmic Disorders	NCT04257994		2017-10-01	2022-10-01	observational (case-only, retrospective)	no
	To Investigate the Effect of Intravenous Ondansetron on Cardiac Conduction as Compared to Placebo and Moxifloxacin in Healthy Adult Subjects	NCT01449188		2011-08-01	2011-12-01	interventional, phase 1	yes
	Food and Insulin Effect on QT/QTC Interval of ECG	NCT01642485		2011-07-01	2014-08-01	interventional, phase 1	yes
	Genetics of QT Response to Moxifloxacin	NCT01936480		2013-10-01	2019-09-01	interventional, phase 4	yes
	Study To Evaluate The Effect Of A Multiple Oral Dose Of PF-00232798 On QT Intervals In Healthy Subjects	NCT01140425		2010-07-01	2010-12-01	interventional, phase 1	yes
	Magnesium Effect on Embryonal PR Interval	NCT03047304		2017-02-01	2018-02-01	interventional	yes
	Antiarrythmic Drugs - Long-term Follow-up in the Modern Era	NCT01082055		2010-03-01	2016-03-01	observational (retrospective)	no
	Hemodynamic Responses to Tracheal Intubation Direct Laryngoscope and Videolaryngoscope in Elderly Patients	NCT02816775		2016-06-01	2016-10-01	interventional, phase 4	yes
	A Phase 1 Study to Evaluate Effects of Sapropterin Dihydrochloride on QTc Intervals in Healthy Adult Subjects	NCT00789568		2008-10-01	2009-01-01	interventional, phase 1	yes
	CARdiac Function Evaluation in Breast Cancer Patients	NCT03266809		2017-08-01	2020-02-01	observational (cohort, prospective)	yes
	The Effect of Erythromycin on Occurrence of Leaks From Cervical Esophageal-Gastric Anastomosis After Trans-Hiatal Esophagectomy	NCT00373919		not provided	not provided	interventional	no
	Comparison of Two Macrolides, Azithromycin and Erythromycin, for Symptomatic Treatment of Gastroparesis	NCT01323582		2009-02-01	2012-12-01	interventional phase 2	no
	Prospective Analysis Of Cardiac Function In Cirrhotic Patients By Echocardiography And Its Correlation With Events	NCT01433848		2011-06-01	not provided	observational (cohort, prospective)	no
	General Anesthesia With ETT vs LMA in Patients Undergoing Ablation for Atrial Fibrillation	NCT02896595		2016-09-01	2018-12-01	interventional	no
	Effectiveness and Safety of Medical Treatment for SARS-CoV-2 (COVID-19) in Colombia	NCT04359095		2020-05-01	2020-10-01	interventional phase 2, phase 3	no
	Phase 2 Study of Quizartinib in Participants With Acute Myeloid Leukemia (AML) FLT3 Internal Tandem Duplication (FLT3/ITD) Mutation	NCT02984995		2016-12-01	2018-03-01	interventional phase 2	no
	Prevention of Atrial Fibrillation Following Esophagectomy	NCT00420017		2005-09-01	2008-11-01	interventional, phase 4	yes
	A Study Evaluating Safety and Pharmacokinetics of ABBV-221 in Subjects With Advanced Solid Tumor Types Likely to Exhibit Elevated Levels of Epidermal Growth Factor Receptor	NCT02365662		2015-01-01	2018-03-01	interventional, phase 1	yes
	Metoprolol Succinate in Cardiac Remodeling Related to Cirrhosis	NCT01676285		2012-01-01	2013-09-01	interventional, phase 3	yes
	Multiple Dose Study to Evaluate the Safety of Multiple Doses of Denosumab 120 mg in Adults With Severe Chronic Kidney Disease (CKD) and CKD on Dialysis	NCT01464931		2011-11-01	2013-01-01	interventional, phase 1	yes
	Intraoperative Volume Management and QT Interval	NCT02441751		2015-05-01	2021-06-01	observational (cohort, prospective)	yes
	Evidence Based Evaluation and Acceptance of Donor Hearts for Transplantation	NCT02376387		2015-03-01	2020-06-01	observational (cohort, prospective)	yes
	A Study of CAN008 for Newly Diagnosed Glioblastoma Multiforme	NCT02853565		2016-08-01	2018-09-01	interventional, phase 1	yes
	Observational Study to Assess the Adequacy of Methadone Dosage, in Heroin Addicted Patients in a MMT.	NCT02062736		2010-02-01	2014-02-01	observational (cohort, prospective)	no
	Typical Daily Experiences, Ischemia and Repolarization in Coronary Artery Disease	NCT01531231		2012-01-01	2015-01-01	observational (cohort, prospective)	yes
	Effects of Escitalopram on Autonomic Reactivity in Post Traumatic Stress Disorder	NCT01271244		2008-06-01	2013-06-01	interventional, phase 4	yes
	A Study of LY2510924 and Durvalumab in Participants With Solid Tumors	NCT02737072		2016-09-01	2017-09-01	interventional, phase 1	no
	Introduction of Eurartesim® in Burkina Faso, Mozambique, Ghana and Tanzania	NCT02199951		2013-09-01	2014-08-01	observational (cohort, prospective)	yes
	Effect of Antenatal SSRI Exposure on the QT Interval of Neonates	NCT02492347		2016-02-01	2017-08-01	interventional	yes
	Comparison of Cardiotoxicity Induced by Selective Estrogen REceptor Modulators and aNti-Aromatase	NCT03259711		2001-01-01	2017-08-01	observational (case-only, retrospective)	yes
	An Observational Safety Study in Zelboraf (Vemurafenib)-Treated Patients With BRAF-V600 Mutation-Positive Unresectable or Metastatic Melanoma (ZeSS)	NCT01990248		2013-03-01	2016-07-01	observational (cohort, prospective)	yes
	STudy to vAlidate telemetRic ECG Systems for firsT Dose Administration of Fingolimod (START)	NCT01585298		2012-04-01	2016-12-01	interventional, phase 4	yes
	DHA-PQP vs Chloroquine and Primaquine for Radical Cure of Vivax Malaria in Brazil	NCT03208907		2018-07-01	2019-12-01	interventional, phase 3	yes
	Imaging of Brain Amyloid Plaques in the Aging Population	NCT00950430		2008-04-01	2023-04-01	interventional, phase 4	yes
	Intravenous Haloperidol Versus Ondansetron for Treatment of Established Post-operative Nausea and Vomiting	NCT02143531		2008-09-01	2012-08-01	interventional, phase 4	yes
	A Phase 3, Long-term, Extension Study of TVP-1012 (1 mg) in Early Parkinson's Disease Participants	NCT02337751		2015-07-01	2017-03-01	interventional, phase 3	yes
	Hydroxychloroquine for Thrombosis Prevention and Antiphospholipid Antibody Reduction in Primary Antiphospholipid Syndrome	NCT04153201		2013-01-01	2019-10-01	interventional	yes
	Haldol/Diphenhydramine Versus Metoclopramide/Diphenhydramine for Treatment of Acute Headache in the Emergency Department: A Randomized Controlled Trial	NCT02098499		2013-06-01	2014-02-01	interventional, phase 4	yes
	Building Evidence for Advancing New Treatment for Rifampicin Resistant Tuberculosis (RR-TB) Comparing a Short Course of Treatment (Containing Bedaquiline, Delamanid and Linezolid) With the Current South African Standard of Care	NCT04062201		2019-08-01	2023-03-01	interventional, phase 3	yes
	MEA112997 Open-label Long Term Extension Safety Study of Mepolizumab in Asthmatic Subjects	NCT01691859		2012-09-01	2017-05-01	interventional, phase 3	yes
	Treatment With Tamoxifen in Cryptococcal Meningitis	NCT03112031		2017-10-01	2018-07-01	interventional phase 2	yes
	Cardiac COVID-19 Health Care Workers	NCT04413071		2020-05-01	2020-06-01	observational (cohort, cross-sectional)	yes
	First In Human Study With ABBV-CLS-579 When Given Alone Or In Combination With Programmed Cell Death-1 Inhibitor In Participants With Locally Advanced Or Metastatic Tumors	NCT04417465		2020-06-01	2023-04-01	interventional, phase 1	yes
	Pragmatic Clinical Trial for a More Effective Concise and Less Toxic MDR-TB Treatment Regimen(s)	NCT02589782		2017-01-01	2020-06-01	interventional, phase 2/3	yes
	Safety and Pharmacokinetics of Quinidine Alone and in Combination With Dabigatran Etexilate	NCT02171624		2009-03-01	2009-04-01	interventional, phase 1	yes
	Pharmacokinetics and Safety of Moxifloxacin	NCT01329250		2011-05-01	2015-06-01	interventional, phase 4	yes
	A Phase I, Multicenter Dose Escalation Study in Patients With Hairy Cell Leukemia	NCT00586924		2007-05-01	2015-05-01	interventional, phase 1	yes
	Long-term Safety of SPD422 in Japanese Adults With Essential Thrombocythaemia	NCT01467661		2010-10-01	2015-05-01	interventional, phase 3	yes
	A Safety and Efficacy Study of Eltrombopag in Subjects With AML	NCT01890746		2013-09-01	2015-03-01	interventional phase 2	yes
	Vandetanib Risk Minimisation Effectiveness	NCT01757470		2012-06-01	2014-02-01	observational (cohort, prospective)	yes
	A 12-Week Study To Assess The Safety Of Fluticasone Propionate/Salmeterol 100/50 Hydrofluoroalkane (HFA) Versus Fluticasone Propionate 100 HFA In Children With Asthma	NCT00441441		2007-02-01	2008-01-01	interventional, phase 3	yes
	A Study to Evaluate the Safety and Antitumor Activity in Subjects With Advanced Solid Tumors	NCT01248949		2010-10-01	2015-07-01	interventional, phase 1	yes
	Effect of Regulated Add -on Sodium Chloride Intake on Stabilization of Serum Lithium Concentration in Bipolar Disorder	NCT04222816		2020-01-01	2021-12-01	interventional, phase 4	yes
	A Study of the Efficacy and Safety of MEDI-546 in Systemic Lupus Erythematosus	NCT01438489		2012-01-01	2015-04-01	interventional phase 2	yes
	A Study to Evaluate Pazopanib in Comparison to Pemetrexed in Maintenance Setting in Non-progressing Subjects With Metastatic Stage IVA and IVB Non-squamous Non-small Cell Lung Cancer (NSCLC) Population	NCT01313663		2011-02-01	2012-07-01	interventional phase 2	yes
	Special Investigation For Renal Cell Carcinoma (RCC) Of Sunitinib Malate (Regulatory Post Marketing Commitment Plan)	NCT00716625		2008-06-01	2015-10-01	observational (case-only, prospective)	no
	Special Investigation For Gist Of Sunitinib Malate (Regulatory Post Marketing Commitment Plan).	NCT00716820		2008-04-01	2015-10-01	observational (case-only, prospective)	no
	Phase II Study of Dasatinib (BMS-354825) for Androgen-deprived Progressive Prostate Cancer	NCT00385580		2007-01-01	2008-12-01	interventional phase 2	yes
	Studies of a Candidate Aminoquinoline Antimalarial (AQ-13)	NCT01614964		2013-08-01	2016-01-01	interventional, phase 2	yes
	Hydroxychloroquine Post-Exposure Prophylaxis for Coronavirus Disease (COVID-19) Among Health-Care Workers: A Randomized-Controlled Trial	NCT04438837		2020-06-01	2022-06-01	interventional	no
	A Phase 2A Evaluation of the Safety, Tolerability, Pharmacokinetics, Efficacy of Clofazimine (CFZ) in Cryptosporidiosis	NCT03341767		2017-12-01	2019-04-01	interventional, phase 2	yes
	Case Collection Study to Determine the Accuracy, Call Back and Cancer Detection Rates of QT Ultrasound in Breast Imaging	NCT03052166		2017-04-01	2019-12-01	observational (cohort, prospective)	no
	Efficacy and Safety Study of Tafenoquine (TQ) Co-administered With Dihydroartemisinin-piperaquine (DHA-PQP) for the Radical Cure of Plasmodium Vivax (P. Vivax) Malaria	NCT02802501		2018-04-01	2019-08-01	interventional, phase 3	yes
	Case Collection Study in the Evaluation of Doubling Time Rates in Non-Suspicious Breast Masses Using QT Ultrasound Technology	NCT03470051		2018-02-01	2020-03-01	observational (prospective)	no
	The Influences of Long Periods of Pneumoperitoneum and Head up Position on the Variation of Heart-rate Corrected QT Interval During Robotic-assisted Laparoscopic Gastrectomy - Observational Study	NCT02604979		2015-09-01	2016-02-01	observational (prospective)	yes
	Sickle Cell Disease and CardiovAscular Risk - Red Cell Exchange Trial (SCD-CARRE)	NCT04084080		2020-02-01	2025-12-01	interventional, phase 3	yes
	Study of AG-120 (Ivosidenib) vs. Placebo in Combination With Azacitidine in Patients With Previously Untreated Acute Myeloid Leukemia With an IDH1 Mutation	NCT03173248		2017-06-01	2021-10-01	interventional, phase 3	yes
	A Phase 2a Study to Evaluate the Effects of Sirukumab in Subjects With Severe Poorly Controlled Asthma	NCT02794519		2016-09-01	2016-10-01	interventional, phase 2	yes
	P Wave and QT Dispersion in Psoriasis	NCT02045485		2006-01-01	2006-06-01	observational (case-control, prospective)	yes
	Long-term PK and Safety/Tolerability Testing LDLL600 Against Esmolol in Healthy Volunteers	NCT01741519		2012-12-01	2013-01-01	interventional, phase 1	yes
	A Phase I Study to Assess the Safety, Pharmacokinetics, and Potential Effects of Amrubicin on the QT/QTc Interval in Cancer Patients With Advanced Solid Tumors.	NCT00915083		2009-06-01	2011-05-01	interventional, phase 1	yes
	Trial of Intravenous Azithromycin to Eradicate Ureaplasma Respiratory Tract Infection in Preterm Infants	NCT01778634		2013-07-01	2016-12-01	interventional phase 2	yes
	Study of DA-9501 In Pediatric Subjects In The Intensive Care Unit	NCT02757625		2016-07-01	2017-05-01	interventional, phase 3	yes
	A Long-term Safety and Efficacy of EnXtra (E-AG-01) in Healthy Adults	NCT03731286		2018-11-01	2019-08-01	interventional	yes
	Methadone-Induced QT Interval Prolongation in a Narcotic Treatment Center	NCT02898337		2016-11-01	2020-06-01	observational (cohort)	yes
	Ventricular Repolarization in Patients With Premature Ovarian Insufficiency (QT-IOP)	NCT04167033		2020-06-01	2023-08-01	interventional	yes
	Effects of OMACOR in patients with a cardiac sodium channel gene SCN5A mutation, one variant of the congenital long-QT syndrome. A proof of concept study.		2009-011819-20	2009-10-01	2010-05-01	interventional	yes
	A Phase 2, Dose-Finding, Randomized, Parallel-Group, Double-Blind, Placebo-Controlled Study, Evaluating the Safety and Efficacy of Pridopidine 45 mg, 67.5 mg, 90 mg, and 112.5 mg Twice-Daily versus...		2013-001888-23	2014-01-01	2016-07-01	interventional phase 2	yes
	A Single-Blind, Multicenter, Placebo-Controlled, Sequential Design Study Evaluating the Potential Effects of a Single-Dose Administration of Trabectedin on the QT Intervals of the Electrocardiogram		2008-004967-21	2008-10-01	2009-12-01	interventional	yes
	Phase I/II study on concomitant and adjuvant Temozolomide and Radiotherapy with or without PTK787/ZK222583 in newly diagnosed GBM		2004-003896-35	2005-08-01	2008-09-01	interventional, phase 1/2	no
	A 12-Week, Open-Label Extension Study of Lurasidone (SM-13496) in Subjects with Schizophrenia		2016-000061-23	2017-03-01	2019-01-01	interventional	no
	A Phase 1/2, Open-Label, Safety, Pharmacokinetic and Preliminary Efficacy Study of Oral CO-1686 in Patients with Previously Treated Mutant EGFR Non-small Cell Lung Cancer (NSCLC)		2011-005215-86	2013-05-01	2018-08-01	interventional, phase 1/2	yes
	A Single Blind, Randomized, Placebo Controlled, Repeat Dose, Dose Escalating Study Investigating Safety, Tolerability pharmacokinetics, Pharmacodynamics and the Beta-Cell Preserving Effect of Otelixizumab in New-Onset, Autoimmune Type 1 Diabetes Mellitus Patients		2013-003296-34	2014-01-01	2018-09-01	interventional	yes
	A Phase 2/3, Randomized, Double-Blind, Placebo-Controlled Study to Evaluate the Effect of GS-6615 on Exercise Capacity in Subjects with Symptomatic Hypertrophic Cardiomyopathy		2013-00429-97	2015-03-01	2017-02-01	interventional, phase 2/3	no
	A Multicenter Phase 2 Study of Single-agent Filanesib (ARRY-520) in Patients With Advanced Multiple Myeloma		2014-001051-23	2014-10-01	2017-09-01	interventional, phase 2	yes
	Randomised, controlled clinical study regarding the feasibility of converting opiate dependents from methadone substitutes to slow release morphine sulphage (sevre-long)		2008-002185-60	2009-07-01	2011-06-01	interventional	yes
	A Phase 2, Randomized, Open-Label Study of the Safety and Efficacy of Two Doses of Quizartinib (AC220; ASP2689) in Subjects with FLT3-ITD Positive Relapsed or Refractory Acute Myeloid Leukaemia (AML)		2011-005408-13	2012-09-01	2015-03-01	interventional, phase 2	yes
	Phase 2, open-label single arm study of the efficacy and safety of PF 02341066 in patients with advanced non-small cell lung cancer (NSCLC) harboring a translocation or inversion involving the anap...		2009-012504-13	2010-01-01	2015-12-01	interventional, phase 2	yes
	A phase I/II Multi-centre Study of AZD8931 in Combination with Weekly Paclitaxel to Assess the Safety, Tolerability, Pharmacokinetics and Efficacy in Patients with Advanced Solid Tumours and in a S...		2009-010551-26	2009-08-01	2015-02-01	interventional, phase 1/2	yes
	A 52-week open-label extension study of the long-term safety and efficacy of rosiglitazone extended-release (RSG XR) as adjunctive therapy to acetylcholinesterase inhibitors in subjects with mild-to-moderate Alzheimer disease		2006-004152-20	2007-11-01	2009-05-01	interventional, phase 3	no (only eligibility criteria for enrolment)
	Phase 3, randomized, open-label study of the efficacy and safety of PF 02341066 versus standard of care chemotherapy (pemetrexed or docetaxel) in patients with advanced non-small cell lung cancer (NSCLC) harboring a translocation or inversion event involving the analplastic lymphoma kinase (ALK) gene locus		2009-012595-27	2010-01-01	2016-01-01	interventional, phase 3	yes
	A Single-Centre, Double-blind, Double-dummy, Randomised, Placebo Controlled, Four Period Crossover Study to Assess the Effect of Single Oral Doses of AZD5672 (600mg and 150mg) on QT/QTc Interval, C.		2009-011044-20	2009-04-01	2009-07-01	interventional	yes
	A randomised, double-blind, placebo-controlled, 4-way crossover clinical trial to assess the efficacy, safety, tolerability and pharmacokinetics of single doses of LAS100977 administered by inhalat...		2008-004756-69	2008-01-01	2009-03-01	interventional	yes
	A Placebo Controlled, Randomized, Double-Blind, Fixed-dose, Multicenter, Phase IIb Study to Investigate the Efficacy and Tolerability of BAY 58-2667 (150 µg/h, 100 µg/h, 50 µg/h) Given Intravenousl...		2009-014377-40	2010-01-01	2011-02-01	interventional phase 2b	yes
	A Randomised, Placebo-controlled, Double-blind, Parallel-group, Multicentre, Phase IIa Study to Explore the Relationship between QTcF Interval at First Dose (Loading Dose) and at Steady State after...		2007-007058-79	2008-01-01	2008-08-01	interventional phase 2a	yes
	A Placebo Controlled, Randomized, Double-Blind, Fixed-dose, Multicenter, Phase IIb Study to Investigate the Efficacy and Tolerability of Low Dose BAY 58-2667 (25 μg/h, 10 μg/h) Given Intravenously ...		2009-014378-16	2010-01-01	2010-11-01	interventional phase 2b	yes
	A PHASE IIa, RANDOMISED, DOUBLE-BLIND, MULTIPLE DOSE, PLACEBO CONTROLLED, 3 PERIOD CROSS-OVER, ASCENDING DOSE CLINICAL TRIAL TO ASSESS THE EFFICACY, SAFETY, TOLERABILITY AND PHARMACOKINETICS OF THR...		2008-003732-38	2009-09-01	2008-12-01	interventional phase 2a	yes
	A Randomised, Multi-centre, Double-blind, Double-dummy, two way cross-over, twelve weeks noninferiority study to evaluate the efficacy, safety and tolerability of combination dry powder Fluticasone...		2015-004893-14	2016-08-01	2015-01-01	interventional	no
	An Extension Protocol For Multiple Sclerosis Patients Who Participated in Genzyme-Sponsored Studies of Alemtuzumab		2009-010788-18	2009-07-01	2016-02-01	interventional	yes
	A Phase 2 Study to Assess the Antiarrhythmic and Symptomatic Effect of the Second Generation Antisense Oligonucleotide ISIS 329993 Targeting CRP in Patients with Paroxysmal Atrial Fibrillation		2012-000833-38	2012-06-01	2014-03-01	interventional phase 2	yes
	Bivalirudin versus Heparin in NST and ST-Evaluation myocardial infarction on modern antiplatelet therapy in SWEDEHEART (the VALIDATE - SWEDEHEART-trial)		2012-005260-10	2013-02-01	2017-03-01	interventional phase 2	no
	Double-blind, placebo-controlled, randomized, parallel-group Phase II study in subjects with relapsing forms of multiple sclerosis (MS) to evaluate the safety, tolerability, and effects of two dose...		2006-002204-33	2007-03-01	2010-07-01	interventional phase 2	no
	A Placebo Controlled, Randomized, Double-Blind, Fixed-dose, Multicenter, Phase IIb Study to Investigate the Efficacy and Tolerability of BAY 58-2667 (50 μg/h, 100 μg/h, 150 μg/h) Given Intravenousl...		2009-017082-39	2010-02-01	2011-03-01	interventional phase 2b	yes
	A Multicenter Single-arm Extension Study to Characterize the Long-term Safety of Cinacalcet Hydrochloride in the Treatment of Secondary Hyperparathyroidism in Pediatric Subjects With Chronic Kidn...		2014-003563-38	2015-04-01	2017-03-01	interventional phase 2	no
	A Phase 2 Proof-of-Concept, Multicenter, Randomized, Double-blind, Placebo-controlled Study to Evaluate the Safety, Tolerability, Pharmacokinetics, Pharmacodynamics and Efficacy of Pomalidomide (CC...		2010-023047-15	2012-03-01	2016-11-01	interventional phase 2	yes
	A Phase 2b, Randomized, Double-Blind, Placebo-Controlled Trial Evaluating 16 and 24 Weeks of a Four-Drug Regimen and 24 Weeks of a Three-Drug Regimen of GS-9451, Peginterferon Alfa 2a (PEG, Pegasys...		2010-023952-10	2011-06-01	2013-09-01	interventional phase 2b	no
	Randomized, Double-Blind, Placebo-Controlled, 4-Way Crossover Study to Evaluate the Safety, Tolerability and Effect on Atrial Fibrillation Burden of BMS-914392 in Patients with Paroxysmal Atrial Fi...		2010-022947-39	2011-03-01	2012-06-01	interventional	yes
	A three-month, double-blind, double dummy, parallel group, controlled study comparing the efficacy and safety between 12 µg twice daily of Formoterol-HFA and 12 µg twice daily of Formoterol-DPI (Fo...		2004-000755-41	2004-09-01	2005-06-01	interventional	yes
	A Phase 2, Double-Blind, Randomized, Placebo Controlled, Dose Ranging, Parallel Group Study to Evaluate the Effect of GS-6615 on Ventricular Arrhythmia in Subjects with Implantable Cardioverter-Def...		2013-004430-15	2014-10-01	2016-10-01	interventional	yes
	CXCR4 Antagonism for Cell Mobilisation and Healing in Acute Myocardial Infarction (CATCH-AMI) A Phase IIa, Double-Blind, Placebo-Controlled, Randomised, Multi-centre Study of POL6326, a CXCR4 A...		2012-003229-91	2013-06-01	2016-08-01	interventional	no
	A 12-Week, Open-Label Extension Study of Lurasidone (SM-13496) in Subjects with Schizophrenia		2016-000061-23	2017-03-01	2019-01-01	interventional	no
	A Phase 2b, Randomized, Double-Blind, Placebo-Controlled Trial Evaluating 16 and 24 Weeks of Response Guided Therapy With GS-9190, GS-9256, Ribavirin (Copegus®) and Peginterferon Alfa 2a (Pegasys®)...		2010-020911-35	2011-01-01	2013-09-01	interventional	no
	A Phase IIa, randomised, double blind, placebo controlled, three way crossover study to assess the pharmacokinetics of RPL554 administered to adult patients with Cystic Fibrosis.		2015-004263-36	2016-12-01	2017-11-01	interventional	yes
	A Phase 2/3, Randomized, Double-Blind, Placebo-Controlled Study to Evaluate the Effect of GS-6615 on Exercise Capacity in Subjects with Symptomatic Hypertrophic Cardiomyopathy		2013-004429-97	2015-03-01	2017-02-01	interventional	no
	A RANDOMIZED PHASE 2 STUDY OF PF-05212384 PLUS IRINOTECAN VERSUS CETUXIMAB PLUS IRINOTECAN IN PATIENTS WITH KRAS AND NRAS WILD TYPE METASTATIC COLORECTAL CANCER		2013-002095-40	2014-06-01	2016-04-01	interventional phase 2	yes
	An Open-Label, Randomized, Phase 3 Study of Inotuzumab Ozogamicin (CMC-544) Administered in Combination With Rituximab Compared to a Defined Investigator’s Choice Therapy in Subjects With Relapsed ...		2007-000219-27	2008-04-01	2011-04-01	interventional	yes
	A Phase IIIb, Double-Blind, Placebo-Controlled, Multicenter, Parallel Group, Extension Trial to Evaluate the Safety and Tolerability of Oral Cladribine in Subjects with Relapsing-Remitting Multiple...		2007-000381-20	2007-11-01	2012-02-01	interventional phase 3	no
	A phase II, randomised, double blind, placebo controlled, six way crossover study to assess the bronchodilator effect of RPL554 administered on top of salbutamol and ipratropium in patients with COPD		2015-002536-41	2015-09-01	2015-12-01	interventional	no
	A phase II, randomised, double blind, placebo controlled, three way crossover study to assess the bronchodilator effect of RPL554 administered in addition to open label tiotropium in patients with ...		2016-004450-15	2017-01-01	2017-07-01	interventional	no
	A PHASE II, RANDOMISED, DOUBLE BLIND, PLACEBO CONTROLLED, THREE WAY CROSSOVER STUDY TO ASSESS THE BRONCHODILATOR EFFECT OF RPL554 ADMINISTERED IN ADDITION TO OPEN LABEL TIOTROPIUM/OLODATEROL IN PAT...		2018-001037-41	2018-09-01	2018-11-01	interventional	yes
	A Phase 3 Clinical Study to Investigate the Prevention of Relapse in Lymphoma Using Daily Enzastaurin		2005-004630-41	2006-04-01	2013-07-01	interventional	yes

## Sheet: reviewed in-depth
	Title	US study number	EU study number	study start date	study end date	study type	ECG measured?	continual or point recordings?
	Measurement of the Electromechanical Window to Improve the Diagnosis of Congenital Long QT Syndrome	NCT04328378		2020-05-01	2022-05-01	interventional	yes	point
	Long QT Syndrome Screening in Newborns	NCT02412709		2015-06-01	2016-12-01	interventional, phase 2	yes	point
	Prevalence of Congenital Long QT Syndrome and Acquired QT Prolongation in a Hospital Cohort	NCT03544918		2015-06-01	2018-12-01	observational	yes	point
	The Canadian National Long QT Syndrome Registry	NCT02425189		2014-11-01	2025-12-01	observational	yes	point
	Effect of Eleclazine on Shortening of the QT Interval, Safety, and Tolerability in Adults With Long QT Syndrome Type 3	NCT02300558	2014-000042-30	2014-12-01	2016-12-01	interventional, phase 3	yes	both
	Effect of Grapefruit on QT Interval in Healthy Volunteers and Patients With Congenital Long QT Syndrome	NCT02680080		2016-12-01	2018-06-01	interventional	yes	both
	Multicenter Evaluation of Children and Young Adults With Genotype Positive Long QT Syndrome	NCT01705925		2012-03-01	2018-12-01	observational (cohort)	yes	not specified
	Effect of Oral GS-6615 on Dofetilide-Induced QT Prolongation, Safety, and Tolerability in Healthy Adults	NCT02365532		2015-02-01	2015-05-01	interventional, phase 1	yes	not specified
	Abnormal QT-Response to the Sudden Tachycardia Provoked by Standing in Individuals With Drug-induced Long QT Syndrome	NCT02581241		2016-01-01	2017-08-01	interventional	yes	point
	Long Term Prophylactic Therapy of Congenital Long QT Syndrome Type III (LQT3) With Ranolazine	NCT01728025		2012-10-01	2017-11-01	interventional, phase 2	yes	not specified
	Study of the Effect of GS-6615 in Subjects With LQT-3	NCT01849003		2013-05-01	2014-11-01	interventional, phase 1	yes	both
	Novel Form of Acquired Long QT Syndrome	NCT04169100		2011-09-01	2024-03-01	interventional, phase 4	yes	not specified
	Comparison Between Epinephrine and Exercise Test in QT Long Syndrome Patients	NCT01745666		2012-05-01	2018-05-01	interventional	yes	not specified
	QT-prolongation in Psychiatric Hospitals	NCT02043925		2010-10-01	2015-03-01	observational (cohort, prospective)	yes	point
	Determine the Incidence of Long QT Amongst a Large Cohort of Subjects Diagnosed With Unilateral or Bilateral Sensorineural Hearing Loss.	NCT02082431		2014-08-01	2019-12-01	observational (cohort, prospective)	yes	point
	Genetics of QT Prolongation With Antiarrhythmics	NCT02439658		2015-05-01	2018-08-01	observational (case-control, prospective)	yes	point
	Drug Interactions With Risk of QT-prolongation in a General Hospital	NCT02043912		2013-07-01	2014-02-01	observational (cohort, prospective)	yes	not specified
	Efficacy Study of Sodium Channel Blocker in LQT3 Patients	NCT01648205		2012-09-01	2020-07-01	interventional, phase 2	yes	both
	Long QT Syndrome and Sleep Apnea	NCT03678311		2019-03-01	2019-04-01	interventional	yes	both
	Influence of Testosterone Administration on Drug-Induced QT Interval Prolongation and Torsades de Pointes	NCT02513940		2015-08-01	2019-03-01	interventional, phase 4	yes	point
	Hydroxyzine and Risk of Prolongation of QT Interval	NCT02814981		2015-11-01	2017-08-01	observational (cohort, prospective)	yes	not specified
	Long QT Syndrome-Population Genetics and Cardiac Studies	NCT00005176		1985-08-01	2013-04-01	observational (prospective)	yes	both
	Risk of QT-prolongation and Torsade de Pointes in Patients Treated With Acute Medication in a University Hospital	NCT02068170		2014-02-01	2015-03-01	observational (cohort, prospective)	yes	not specified
	Reducing the Risk of Drug-Induced QT Interval Lengthening in Women	NCT03834883		2019-03-01	2022-06-01	interventional, phase 4	yes	point
	The Physiological Effects of Human Ether-a-go-go-Related Gene (hERG)Blockade on Metabolism	NCT03868657		2019-01-01	2019-09-01	interventional	yes	point
	Continuous Versus Intermittent cARdiac Electrical moNitorinG	NCT04336644		2020-08-01	2022-09-01	interventional	yes	both
	A Registry to Determine the Clinical and Genetic Risk Factors for Torsade De Pointes	NCT02439645		2015-05-01	2025-10-01	observational (case-only, prospective)	yes	point
	Effect of Eleclazine on QT, Safety, and Tolerability in Adults With Long QT2 Syndrome	NCT02365506		2015-07-01	2016-05-01	interventional, phase 1	yes	not specified
	Effect of Methadone and Hydromorphone on the QT Interval After Anesthesia and Surgery	NCT03893734		2018-05-01	2020-08-01	interventional, phase 4	yes	point
	QT-Prolongation in Lung Transplantation	NCT02380365		2015-04-01	2016-04-01	observational (cohort, prospective)	yes	point
	Effects Rapid Atrial Pacing Has on the Electrocardiogram (ECG) in Patients With Dual Chamber Pacemakers	NCT00883610		2009-04-01	2012-06-01	observational (cohort, prospective)	yes	both
	ECG Signal Collection From Long QT Syndrome, Wide QRS Complexes, Heart Failure, and Cardiac Resynchronization Patients	NCT00399412		2006-11-01	2007-12-01	observational (cohort, prospective)	yes	point
	Fetal and Neonatal Magnetophysiology	NCT01903564		2014-03-01	2016-06-01	observational (cohort, prospective)	yes	point
	Race Difference Moxifloxacin-induced QT Prolongation Between Healthy Chinese and Caucasian Volunteers	NCT02119091		2014-04-01	2014-06-01	interventional, phase 1	yes	not specified
	Does Azithromycin Cause QT Prolongation in Hospitalized Patients With Severe Community Acquired Pneumonia?	NCT01553734		2012-03-01	2013-05-01	observational (cohort, prospective)	yes	point
	Prevelance of Fragmented QRS Complex and Prolonged QT Interval in Cirrhotic Patients	NCT03158701		2017-06-01	2018-06-01	observational (cohort, prospective)	yes	point
	Worm Study: Modifier Genes in Sudden Cardiac Death	NCT02014961		2015-04-01	2025-04-01	interventional	yes	point
	CiPA Phase 1 ECG Biomarker Validation Study	NCT03070470		2017-03-01	2017-06-01	interventional, phase 1	yes	point
	Ability of Late Sodium or Calcium Current Block to Balance the ECG Effects of Potassium Current Block	NCT02308748		2014-05-01	2014-06-01	interventional, phase 1	yes	point
	Linkage Study of Long QT Syndrome In An Amish Kindred	NCT00005250		1990-01-01	not provided	observational	yes	both
	Influence of Progesterone Administration on Drug-Induced QT Interval Lengthening	NCT01929083		2013-04-01	2014-06-01	interventional, phase 2	yes	not specified
	Molecular Genetic Screening and Identification of Congenital Arrhythmogenic Diseases	NCT00221832		2003-10-01	2011-12-01	observational (prospective)	yes	not specified
	Safety of Local Dental Anesthesia in Patients With Cardiac Channelopathies	NCT03182777		2015-05-01	2018-08-01	interventional	yes	continual
	Long Term Monitoring for Risk of Sudden Death	NCT04124237		2015-05-01	2020-01-01	observational (cohort, prospective)	yes	continual
	Epidemiology of Long QTand Asian Sudden Death in Sleep	NCT00005367		1993-02-01	not provided	observational	yes	both
	Ramosetron Pre-treatment for PONV and QT Prolongation	NCT03278522		2017-07-01	2018-02-01	interventional, phase 4	yes	not specified
	Drug-induced Repolarization ECG Changes	NCT03642405		2018-08-01	2019-09-01	observational (cohort, prospective)	yes	point
	Fetal Electrophysiologic Abnormalities in High-Risk Pregnancies Associated With Fetal Demise	NCT03775954		2018-07-01	2022-04-01	observational (cohort, prospective)	yes	point
	Registry of Unexplained Cardiac Arrest	NCT00292032		2004-05-01	2021-01-01	observational (cohort, prospective)	yes	continual
	Selections of Subjects With Important Changes in Their Cardiac Repolarization Parameters for the Procurement of Skin and Blood Samples	NCT01338441		2011-03-01	2011-05-01	interventional, phase 1	yes	point
	5-HT3 Antagonists (Antiemetics) and Cardiac Safety	NCT02436798		2014-06-01	2020-07-01	observational (prospective)	yes	not specified
	The Effect of General Anesthesia on the Risk for Arrhythmia	NCT01174251		2010-12-01	2013-04-01	observational (cohort, prospective)	yes	continual during the perioperative period
	CIQTP Prolongation : Role and Mechanism in Sudden Cardiac Death	NCT03387072		2018-03-01	2021-03-01	observational (case-control, prospective)	yes	point
	Evaluation of Possible Effects on the QT/ QTc Interval of Rupatadine in Healthy Volunteers	NCT00199225		2005-02-01	not provided	interventional, phase 1	yes	not specified
	China Inherited Ventricular Arrhythmias Registry	NCT03880708		2017-10-01	2022-10-01	observational (cohort, prospective)	yes	not specified
	The Effect of Energy Drink on Cardiovascular Variables: A Randomized Controlled Trial	NCT03841838		2019-02-01	2019-05-01	interventional	yes	point
	Low-dose Epinephrine Infusion Tests in Adolescent and Pediatric Patients	NCT00548886		2008-02-01	2012-01-01	interventional	yes	point
	A Study to Investigate the Effect of Single Dose of AZD6094 (600 mg) on Cardiac Repolarization in Healthy Volunteers	NCT03258515		2017-09-01	2018-03-01	interventional, phase 1	yes	point
	Genetic Sources of Variability of the Adaptation of the Ventricular Repolarisation	NCT00773201		2008-02-01	2012-03-01	interventional, phase 1	yes	not specified
	Infant Medical Records: Case Report Proposal	NCT00268060		2004-09-01	terminated	observational (retrospective)	yes	both
	Ondansetron and the QT Interval In Adult Emergency Department Patients	NCT01759420		2012-12-01	2014-05-01	observational (cohort, prospective)	yes	point
	Effect of Potassium and Acetazolamide on People With Andersen-Tawil Syndrome	NCT00839501		2008-12-01	2011-01-01	interventional, phase 1	yes	continual and point
	Characteristics of Andersen-Tawil Syndrome	NCT00521794		2007-11-01	2012-10-01	observational (cohort, prospective)	yes	not specified
	Methadone Pharmacokinetics and Cardiac Effects in Newborns	NCT00715988		2007-10-01	2012-09-01	interventional, phase 1	yes	continual
	A Dose Ranging Escalation Study of Tramadol Hydrochloride in Healthy Volunteers	NCT01947920		2013-08-01	2013-11-01	interventional, phase 1	yes	point
	Cortisone and QTc-Interval	NCT03082339		2017-04-01	2020-04-01	observational (cohort, prospective)	yes	not specified
	Exercise Induced QT Interval Changes in Response to Intermittent and Continuous Graded Exercise Tests	NCT04005027		2019-07-01	2021-09-01	interventional	yes	point
	Effect of a Multiple-dose Oral Administration of CG5503 PR on the Electrical Activity of the Heart in 48 Healthy Men and Women	NCT03951402		2003-03-01	2003-08-01	interventional, phase 1	yes	point
	To Investigate the Effect of Intravenous Ondansetron on Cardiac Conduction as Compared to Placebo and Moxifloxacin in Healthy Adult Subjects	NCT01449188		2011-08-01	2011-12-01	interventional, phase 1	yes	point
	Food and Insulin Effect on QT/QTC Interval of ECG	NCT01642485		2011-07-01	2014-08-01	interventional, phase 1	yes	point
	Genetics of QT Response to Moxifloxacin	NCT01936480		2013-10-01	2019-09-01	interventional, phase 4	yes	point
	Study To Evaluate The Effect Of A Multiple Oral Dose Of PF-00232798 On QT Intervals In Healthy Subjects	NCT01140425		2010-07-01	2010-12-01	interventional, phase 1	yes	point
	Magnesium Effect on Embryonal PR Interval	NCT03047304		2017-02-01	2018-02-01	interventional	yes	not specified
	Hemodynamic Responses to Tracheal Intubation Direct Laryngoscope and Videolaryngoscope in Elderly Patients	NCT02816775		2016-06-01	2016-10-01	interventional, phase 4	yes	point
	A Phase 1 Study to Evaluate Effects of Sapropterin Dihydrochloride on QTc Intervals in Healthy Adult Subjects	NCT00789568		2008-10-01	2009-01-01	interventional, phase 1	yes	not specified
	CARdiac Function Evaluation in Breast Cancer Patients	NCT03266809		2017-08-01	2020-02-01	observational (cohort, prospective)	yes	not specified
	Prevention of Atrial Fibrillation Following Esophagectomy	NCT00420017		2005-09-01	2008-11-01	interventional, phase 4	yes	not specified
	A Study Evaluating Safety and Pharmacokinetics of ABBV-221 in Subjects With Advanced Solid Tumor Types Likely to Exhibit Elevated Levels of Epidermal Growth Factor Receptor	NCT02365662		2015-01-01	2018-03-01	interventional, phase 1	yes	point
	Metoprolol Succinate in Cardiac Remodeling Related to Cirrhosis	NCT01676285		2012-01-01	2013-09-01	interventional, phase 3	yes	not specified
	Multiple Dose Study to Evaluate the Safety of Multiple Doses of Denosumab 120 mg in Adults With Severe Chronic Kidney Disease (CKD) and CKD on Dialysis	NCT01464931		2011-11-01	2013-01-01	interventional, phase 1	yes	not specified
	Intraoperative Volume Management and QT Interval	NCT02441751		2015-05-01	2021-06-01	observational (cohort, prospective)	yes	not specified
	Evidence Based Evaluation and Acceptance of Donor Hearts for Transplantation	NCT02376387		2015-03-01	2020-06-01	observational (cohort, prospective)	yes	not specified
	A Study of CAN008 for Newly Diagnosed Glioblastoma Multiforme	NCT02853565		2016-08-01	2018-09-01	interventional, phase 1	yes	point
	Typical Daily Experiences, Ischemia and Repolarization in Coronary Artery Disease	NCT01531231		2012-01-01	2015-01-01	observational (cohort, prospective)	yes	not specified
	Effects of Escitalopram on Autonomic Reactivity in Post Traumatic Stress Disorder	NCT01271244		2008-06-01	2013-06-01	interventional, phase 4	yes	not specified
	Introduction of Eurartesim® in Burkina Faso, Mozambique, Ghana and Tanzania	NCT02199951		2013-09-01	2014-08-01	observational (cohort, prospective)	yes	point
	Effect of Antenatal SSRI Exposure on the QT Interval of Neonates	NCT02492347		2016-02-01	2017-08-01	interventional	yes	point
	Comparison of Cardiotoxicity Induced by Selective Estrogen REceptor Modulators and aNti-Aromatase	NCT03259711		2001-01-01	2017-08-01	observational (case-only, retrospective)	yes	not specified
	An Observational Safety Study in Zelboraf (Vemurafenib)-Treated Patients With BRAF-V600 Mutation-Positive Unresectable or Metastatic Melanoma (ZeSS)	NCT01990248		2013-03-01	2016-07-01	observational (cohort, prospective)	yes	not specified
	STudy to vAlidate telemetRic ECG Systems for firsT Dose Administration of Fingolimod (START)	NCT01585298		2012-04-01	2016-12-01	interventional, phase 4	yes	not specified
	DHA-PQP vs Chloroquine and Primaquine for Radical Cure of Vivax Malaria in Brazil	NCT03208907		2018-07-01	2019-12-01	interventional, phase 3	yes	not specified
	Imaging of Brain Amyloid Plaques in the Aging Population	NCT00950430		2008-04-01	2023-04-01	interventional, phase 4	yes	not specified
	Intravenous Haloperidol Versus Ondansetron for Treatment of Established Post-operative Nausea and Vomiting	NCT02143531		2008-09-01	2012-08-01	interventional, phase 4	yes	not specified
	A Phase 3, Long-term, Extension Study of TVP-1012 (1 mg) in Early Parkinson's Disease Participants	NCT02337751		2015-07-01	2017-03-01	interventional, phase 3	yes	not specified
	Hydroxychloroquine for Thrombosis Prevention and Antiphospholipid Antibody Reduction in Primary Antiphospholipid Syndrome	NCT04153201		2013-01-01	2019-10-01	interventional	yes	not specified
	Haldol/Diphenhydramine Versus Metoclopramide/Diphenhydramine for Treatment of Acute Headache in the Emergency Department: A Randomized Controlled Trial	NCT02098499		2013-06-01	2014-02-01	interventional, phase 4	yes	point
	Building Evidence for Advancing New Treatment for Rifampicin Resistant Tuberculosis (RR-TB) Comparing a Short Course of Treatment (Containing Bedaquiline, Delamanid and Linezolid) With the Current South African Standard of Care	NCT04062201		2019-08-01	2023-03-01	interventional, phase 3	yes	not specified
	MEA112997 Open-label Long Term Extension Safety Study of Mepolizumab in Asthmatic Subjects	NCT01691859		2012-09-01	2017-05-01	interventional, phase 3	yes	point
	Treatment With Tamoxifen in Cryptococcal Meningitis	NCT03112031		2017-10-01	2018-07-01	interventional phase 2	yes	point
	Cardiac COVID-19 Health Care Workers	NCT04413071		2020-05-01	2020-06-01	observational (cohort, cross-sectional)	yes	not specified
	First In Human Study With ABBV-CLS-579 When Given Alone Or In Combination With Programmed Cell Death-1 Inhibitor In Participants With Locally Advanced Or Metastatic Tumors	NCT04417465		2020-06-01	2023-04-01	interventional, phase 1	yes	not specified
	Pragmatic Clinical Trial for a More Effective Concise and Less Toxic MDR-TB Treatment Regimen(s)	NCT02589782		2017-01-01	2020-06-01	interventional, phase 2/3	yes	not specified
	Safety and Pharmacokinetics of Quinidine Alone and in Combination With Dabigatran Etexilate	NCT02171624		2009-03-01	2009-04-01	interventional, phase 1	yes	point
	Pharmacokinetics and Safety of Moxifloxacin	NCT01329250		2011-05-01	2015-06-01	interventional, phase 4	yes	not specified
	A Phase I, Multicenter Dose Escalation Study in Patients With Hairy Cell Leukemia	NCT00586924		2007-05-01	2015-05-01	interventional, phase 1	yes	not specified
	Long-term Safety of SPD422 in Japanese Adults With Essential Thrombocythaemia	NCT01467661		2010-10-01	2015-05-01	interventional, phase 3	yes	point
	A Safety and Efficacy Study of Eltrombopag in Subjects With AML	NCT01890746		2013-09-01	2015-03-01	interventional phase 2	yes	not specified
	Vandetanib Risk Minimisation Effectiveness	NCT01757470		2012-06-01	2014-02-01	observational (cohort, prospective)	yes	not specified
	A 12-Week Study To Assess The Safety Of Fluticasone Propionate/Salmeterol 100/50 Hydrofluoroalkane (HFA) Versus Fluticasone Propionate 100 HFA In Children With Asthma	NCT00441441		2007-02-01	2008-01-01	interventional, phase 3	yes	not specified
	A Study to Evaluate the Safety and Antitumor Activity in Subjects With Advanced Solid Tumors	NCT01248949		2010-10-01	2015-07-01	interventional, phase 1	yes	not specified
	Effect of Regulated Add -on Sodium Chloride Intake on Stabilization of Serum Lithium Concentration in Bipolar Disorder	NCT04222816		2020-01-01	2021-12-01	interventional, phase 4	yes	not specified
	A Study of the Efficacy and Safety of MEDI-546 in Systemic Lupus Erythematosus	NCT01438489		2012-01-01	2015-04-01	interventional phase 2	yes	not specified
	A Study to Evaluate Pazopanib in Comparison to Pemetrexed in Maintenance Setting in Non-progressing Subjects With Metastatic Stage IVA and IVB Non-squamous Non-small Cell Lung Cancer (NSCLC) Population	NCT01313663		2011-02-01	2012-07-01	interventional phase 2	yes	not specified
	Phase II Study of Dasatinib (BMS-354825) for Androgen-deprived Progressive Prostate Cancer	NCT00385580		2007-01-01	2008-12-01	interventional phase 2	yes	not specified
	Studies of a Candidate Aminoquinoline Antimalarial (AQ-13)	NCT01614964		2013-08-01	2016-01-01	interventional, phase 2	yes	point
	A Phase 2A Evaluation of the Safety, Tolerability, Pharmacokinetics, Efficacy of Clofazimine (CFZ) in Cryptosporidiosis	NCT03341767		2017-12-01	2019-04-01	interventional, phase 2	yes	point
	Efficacy and Safety Study of Tafenoquine (TQ) Co-administered With Dihydroartemisinin-piperaquine (DHA-PQP) for the Radical Cure of Plasmodium Vivax (P. Vivax) Malaria	NCT02802501		2018-04-01	2019-08-01	interventional, phase 3	yes	point
	The Influences of Long Periods of Pneumoperitoneum and Head up Position on the Variation of Heart-rate Corrected QT Interval During Robotic-assisted Laparoscopic Gastrectomy - Observational Study	NCT02604979		2015-09-01	2016-02-01	observational (prospective)	yes	not specified
	Sickle Cell Disease and CardiovAscular Risk - Red Cell Exchange Trial (SCD-CARRE)	NCT04084080		2020-02-01	2025-12-01	interventional, phase 3	yes	not specified
	Study of AG-120 (Ivosidenib) vs. Placebo in Combination With Azacitidine in Patients With Previously Untreated Acute Myeloid Leukemia With an IDH1 Mutation	NCT03173248		2017-06-01	2021-10-01	interventional, phase 3	yes	point
	A Phase 2a Study to Evaluate the Effects of Sirukumab in Subjects With Severe Poorly Controlled Asthma	NCT02794519		2016-09-01	2016-10-01	interventional, phase 2	yes	point
	P Wave and QT Dispersion in Psoriasis	NCT02045485		2006-01-01	2006-06-01	observational (case-control, prospective)	yes	point
	Long-term PK and Safety/Tolerability Testing LDLL600 Against Esmolol in Healthy Volunteers	NCT01741519		2016-09-01	2016-10-01	interventional, phase 2	yes	not specified
	A Phase I Study to Assess the Safety, Pharmacokinetics, and Potential Effects of Amrubicin on the QT/QTc Interval in Cancer Patients With Advanced Solid Tumors.	NCT00915083		2009-06-01	2011-05-01	interventional, phase 1	yes	continual
	Trial of Intravenous Azithromycin to Eradicate Ureaplasma Respiratory Tract Infection in Preterm Infants	NCT01778634		2013-07-01	2016-12-01	interventional phase 2	yes	not specified
	Study of DA-9501 In Pediatric Subjects In The Intensive Care Unit	NCT02757625		2016-07-01	2017-05-01	interventional, phase 3	yes	not specified
	A Long-term Safety and Efficacy of EnXtra (E-AG-01) in Healthy Adults	NCT03731286		2018-11-01	2019-08-01	interventional	yes	not specified
	Methadone-Induced QT Interval Prolongation in a Narcotic Treatment Center	NCT02898337		2016-11-01	2020-06-01	observational (cohort)	yes	point
	Ventricular Repolarization in Patients With Premature Ovarian Insufficiency (QT-IOP)	NCT04167033		2020-06-01	2023-08-01	interventional	yes	not specified
	Effects of OMACOR in patients with a cardiac sodium channel gene SCN5A mutation, one variant of the congenital long-QT syndrome. A proof of concept study.		2009-011819-20	2009-10-01	2010-05-01	interventional	yes	point
	A Phase 2, Dose-Finding, Randomized, Parallel-Group, Double-Blind, Placebo-Controlled Study, Evaluating the Safety and Efficacy of Pridopidine 45 mg, 67.5 mg, 90 mg, and 112.5 mg Twice-Daily versus...		2013-001888-23	2014-01-01	2016-07-01	interventional phase 2	yes	not specified
	A Single-Blind, Multicenter, Placebo-Controlled, Sequential Design Study Evaluating the Potential Effects of a Single-Dose Administration of Trabectedin on the QT Intervals of the Electrocardiogram		2008-004967-21	2008-10-01	2009-12-01	interventional	yes	point
	A Phase 1/2, Open-Label, Safety, Pharmacokinetic and Preliminary Efficacy Study of Oral CO-1686 in Patients with Previously Treated Mutant EGFR Non-small Cell Lung Cancer (NSCLC)		2011-005215-86	2013-05-01	2018-08-01	interventional, phase 1/2	yes	point
	A Single Blind, Randomized, Placebo Controlled, Repeat Dose, Dose Escalating Study Investigating Safety, Tolerability pharmacokinetics, Pharmacodynamics and the Beta-Cell Preserving Effect of Otelixizumab in New-Onset, Autoimmune Type 1 Diabetes Mellitus Patients		2013-003296-34	2014-01-01	2018-09-01	interventional	yes	point
	A Multicenter Phase 2 Study of Single-agent Filanesib (ARRY-520) in Patients With Advanced Multiple Myeloma		2014-001051-23	2014-10-01	2017-09-01	interventional, phase 2	yes	not specified
	Randomised, controlled clinical study regarding the feasibility of converting opiate dependents from methadone substitutes to slow release morphine sulphage (sevre-long)		2008-002185-60	2009-07-01	2011-06-01	interventional	yes	point (assumed)
	A Phase 2, Randomized, Open-Label Study of the Safety and Efficacy of Two Doses of Quizartinib (AC220; ASP2689) in Subjects with FLT3-ITD Positive Relapsed or Refractory Acute Myeloid Leukaemia (AML)		2011-005408-13	2012-09-01	2015-03-01	interventional, phase 2	yes	not specified
	Phase 2, open-label single arm study of the efficacy and safety of PF 02341066 in patients with advanced non-small cell lung cancer (NSCLC) harboring a translocation or inversion involving the anap...		2009-012504-13	2010-01-01	2015-12-01	interventional, phase 2	yes	point
	A phase I/II Multi-centre Study of AZD8931 in Combination with Weekly Paclitaxel to Assess the Safety, Tolerability, Pharmacokinetics and Efficacy in Patients with Advanced Solid Tumours and in a S...		2009-010551-26	2009-08-01	2015-02-01	interventional, phase 1/2	yes	point
	Phase 3, randomized, open-label study of the efficacy and safety of PF 02341066 versus standard of care chemotherapy (pemetrexed or docetaxel) in patients with advanced non-small cell lung cancer (NSCLC) harboring a translocation or inversion event involving the analplastic lymphoma kinase (ALK) gene locus		2009-012595-27	2010-01-01	2016-01-01	interventional, phase 3	yes	not specified
	A Single-Centre, Double-blind, Double-dummy, Randomised, Placebo Controlled, Four Period Crossover Study to Assess the Effect of Single Oral Doses of AZD5672 (600mg and 150mg) on QT/QTc Interval, C.		2009-011044-20	2009-04-01	2009-07-01	interventional	yes	point
	A randomised, double-blind, placebo-controlled, 4-way crossover clinical trial to assess the efficacy, safety, tolerability and pharmacokinetics of single doses of LAS100977 administered by inhalat...		2008-004756-69	2008-01-01	2009-03-01	interventional	yes	point
	A Placebo Controlled, Randomized, Double-Blind, Fixed-dose, Multicenter, Phase IIb Study to Investigate the Efficacy and Tolerability of BAY 58-2667 (150 µg/h, 100 µg/h, 50 µg/h) Given Intravenousl...		2009-014377-40	2010-01-01	2011-02-01	interventional phase 2b	yes	both
	A Randomised, Placebo-controlled, Double-blind, Parallel-group, Multicentre, Phase IIa Study to Explore the Relationship between QTcF Interval at First Dose (Loading Dose) and at Steady State after...		2007-007058-79	2008-01-01	2008-08-01	interventional phase 2a	yes	not specified
	A Placebo Controlled, Randomized, Double-Blind, Fixed-dose, Multicenter, Phase IIb Study to Investigate the Efficacy and Tolerability of Low Dose BAY 58-2667 (25 μg/h, 10 μg/h) Given Intravenously ...		2009-014378-16	2010-01-01	2010-11-01	interventional phase 2b	yes	not specified
	A PHASE IIa, RANDOMISED, DOUBLE-BLIND, MULTIPLE DOSE, PLACEBO CONTROLLED, 3 PERIOD CROSS-OVER, ASCENDING DOSE CLINICAL TRIAL TO ASSESS THE EFFICACY, SAFETY, TOLERABILITY AND PHARMACOKINETICS OF THR...		2008-003732-38	2009-09-01	2008-12-01	interventional phase 2a	yes	point
	An Extension Protocol For Multiple Sclerosis Patients Who Participated in Genzyme-Sponsored Studies of Alemtuzumab		2009-010788-18	2009-07-01	2016-02-01	interventional phase 2a	yes	not specified
	A Phase 2 Study to Assess the Antiarrhythmic and Symptomatic Effect of the Second Generation Antisense Oligonucleotide ISIS 329993 Targeting CRP in Patients with Paroxysmal Atrial Fibrillation		2012-000833-38	2012-06-01	2014-03-01	interventional phase 2a	yes	continual
	A Placebo Controlled, Randomized, Double-Blind, Fixed-dose, Multicenter, Phase IIb Study to Investigate the Efficacy and Tolerability of BAY 58-2667 (50 μg/h, 100 μg/h, 150 μg/h) Given Intravenousl...		2009-017082-39	2010-02-01	2011-03-01	interventional phase 2b	yes	not specified
	A Phase 2 Proof-of-Concept, Multicenter, Randomized, Double-blind, Placebo-controlled Study to Evaluate the Safety, Tolerability, Pharmacokinetics, Pharmacodynamics and Efficacy of Pomalidomide (CC...		2010-023047-15	2012-03-01	2016-11-01	interventional phase 2	yes	not specified
	Randomized, Double-Blind, Placebo-Controlled, 4-Way Crossover Study to Evaluate the Safety, Tolerability and Effect on Atrial Fibrillation Burden of BMS-914392 in Patients with Paroxysmal Atrial Fi...		2010-022947-39	2011-03-01	2012-06-01	interventional	yes	not specified
	A three-month, double-blind, double dummy, parallel group, controlled study comparing the efficacy and safety between 12 µg twice daily of Formoterol-HFA and 12 µg twice daily of Formoterol-DPI (Fo...		2004-000755-41	2004-09-01	2005-06-01	interventional	yes	point
	A Phase 2, Double-Blind, Randomized, Placebo Controlled, Dose Ranging, Parallel Group Study to Evaluate the Effect of GS-6615 on Ventricular Arrhythmia in Subjects with Implantable Cardioverter-Def...		2013-004430-15	2014-10-01	2016-10-01	interventional	yes	continual
	A Phase IIa, randomised, double blind, placebo controlled, three way crossover study to assess the pharmacokinetics of RPL554 administered to adult patients with Cystic Fibrosis.		2015-004263-36	2016-12-01	2017-11-01	interventional phase 2a	yes	not specified
	A RANDOMIZED PHASE 2 STUDY OF PF-05212384 PLUS IRINOTECAN VERSUS CETUXIMAB PLUS IRINOTECAN IN PATIENTS WITH KRAS AND NRAS WILD TYPE METASTATIC COLORECTAL CANCER		2013-002095-40	2014-06-01	2016-04-01	interventional phase 2	yes	point
	An Open-Label, Randomized, Phase 3 Study of Inotuzumab Ozogamicin (CMC-544) Administered in Combination With Rituximab Compared to a Defined Investigator’s Choice Therapy in Subjects With Relapsed ...		2007-000219-27	2008-04-01	2011-04-01	interventional	yes	point
	A PHASE II, RANDOMISED, DOUBLE BLIND, PLACEBO CONTROLLED, THREE WAY CROSSOVER STUDY TO ASSESS THE BRONCHODILATOR EFFECT OF RPL554 ADMINISTERED IN ADDITION TO OPEN LABEL TIOTROPIUM/OLODATEROL IN PAT...		2018-001037-41	2018-09-01	2018-11-01	interventional phase 2a	yes	not specified
	A Phase 3 Clinical Study to Investigate the Prevention of Relapse in Lymphoma Using Daily Enzastaurin		2005-004630-41	2006-04-01	2013-07-01	interventional phase 2a	yes	not specified

## Sheet: analysed - LQTS
	Title	US study number	EU study number	study start date	study end date	study type	ECG measured?	continual or point recordings?	continual: how long for? (eg 24hrs)	continual: diurnal analysis?	point readings: how many readings?	point readings: time point specified?	drug administered?	time of day drug administered specified?	results?
	Measurement of the Electromechanical Window to Improve the Diagnosis of Congenital Long QT Syndrome	NCT04328378		2020-05-01	2022-05-01	interventional	yes	point	N/A	N/A	1	not specified	no	N/A	no
	Long QT Syndrome Screening in Newborns	NCT02412709		2015-06-01	2016-12-01	interventional, phase 2	yes	point	N/A	N/A	1	not specified	no	N/A	no
	Prevalence of Congenital Long QT Syndrome and Acquired QT Prolongation in a Hospital Cohort	NCT03544918		2015-06-01	2018-12-01	observational	yes	point	N/A	N/A	not specified	not specified	no	N/A	no
	The Canadian National Long QT Syndrome Registry	NCT02425189		2014-11-01	2025-12-01	observational	yes	point	N/A	N/A	1 (per year)	not specified	no	N/A	no
	Effect of Eleclazine on Shortening of the QT Interval, Safety, and Tolerability in Adults With Long QT Syndrome Type 3	NCT02300558	2014-000042-30	2014-12-01	2016-12-01	interventional, phase 3	yes	both	24 hours	diurnal analysis	not specified	not specified	no	N/A	yes
	Effect of Grapefruit on QT Interval in Healthy Volunteers and Patients With Congenital Long QT Syndrome	NCT02680080		2016-12-01	2018-06-01	interventional	yes	both	24 hours	not specified	8	yes - at 1, 2, 3, 4, 6, 8, 12 and 24 hours after fresh pink-grapefruit juice administration	yes (fresh prink-grapefruit juice)	not specified	no
	Study of the Effect of GS-6615 in Subjects With LQT-3	NCT01849003		2013-05-01	2014-11-01	interventional, phase 1	yes	both	duration of study (several days in hospital with Holter monitor)	not specified	not specified	yes - "time-matched analysis"	yes	not specified	no
	Determine the Incidence of Long QT Amongst a Large Cohort of Subjects Diagnosed With Unilateral or Bilateral Sensorineural Hearing Loss.	NCT02082431		2014-08-01	2019-12-01	observational (cohort, prospective)	yes	point	N/A	N/A	not specified	not specified	no	N/A	no
	Efficacy Study of Sodium Channel Blocker in LQT3 Patients	NCT01648205		2012-09-01	2020-07-01	interventional, phase 2	yes	both	24 hours	not specified	several "periodic"	not specified	yes	not specified	no
	Long QT Syndrome and Sleep Apnea	NCT03678311		2019-03-01	2019-04-01	interventional	yes	both	24 hours	diurnal analysis	not specified	not specified	no	N/A	no
	Long QT Syndrome-Population Genetics and Cardiac Studies	NCT00005176		1985-08-01	2013-04-01	observational (prospective)	yes	both	24 hours	not specified	not specified	not specified	no	N/A	no
	A Registry to Determine the Clinical and Genetic Risk Factors for Torsade De Pointes	NCT02439645		2015-05-01	2025-10-01	observational (case-only, prospective)	yes	point	N/A	N/A	not specified (clinically available)	not specified (available clinical data )	no	N/A	no
	ECG Signal Collection From Long QT Syndrome, Wide QRS Complexes, Heart Failure, and Cardiac Resynchronization Patients	NCT00399412		2006-11-01	2007-12-01	observational (cohort, prospective)	yes	point	N/A	N/A	not specified (at follow-up appointment)	not specified	no	N/A	no
	Worm Study: Modifier Genes in Sudden Cardiac Death	NCT02014961		2015-04-01	2025-04-01	interventional	yes	point	N/A	N/A	not specified	not specified	no	N/A	no
	Linkage Study of Long QT Syndrome In An Amish Kindred	NCT00005250		1990-01-01	not provided	observational	yes	both	24 hours	not specified	not specified	not specified	no	N/A	no
	Safety of Local Dental Anesthesia in Patients With Cardiac Channelopathies	NCT03182777		2015-05-01	2018-08-01	interventional	yes	continual	28 hours	not specified	N/A	N/A	yes	yes - "in the morning period"	no
	Long Term Monitoring for Risk of Sudden Death	NCT04124237		2015-05-01	2020-01-01	observational (cohort, prospective)	yes	continual	Implanted device (Loop recorder)	not specified	N/A	N/A	no	N/A	no
	Epidemiology of Long QTand Asian Sudden Death in Sleep	NCT00005367		1993-02-01	not provided	observational	yes	both	24 hours	diurnal analysis	not specified	not specified	no	N/A	no
	Registry of Unexplained Cardiac Arrest	NCT00292032		2004-05-01	2021-01-01	observational (cohort, prospective)	yes	continual	24 hours	not specified	N/A	N/A	yes	not specified	no
	Selections of Subjects With Important Changes in Their Cardiac Repolarization Parameters for the Procurement of Skin and Blood Samples	NCT01338441		2011-03-01	2011-05-01	interventional, phase 1	yes	point	N/A	N/A	not	not specified (specified in relation to drug administration)	yes	not specified	no
	CIQTP Prolongation : Role and Mechanism in Sudden Cardiac Death	NCT03387072		2018-03-01	2021-03-01	observational (case-control, prospective)	yes	point	N/A	N/A	not specified	not specified	yes	not specified	no
	Effect of Potassium and Acetazolamide on People With Andersen-Tawil Syndrome	NCT00839501		2008-12-01	2011-01-01	interventional, phase 1	yes	both	24 hours	not specified	not specified	not specified	yes	not specified	no
	Effects of OMACOR in patients with a cardiac sodium channel gene SCN5A mutation, one variant of the congenital long-QT syndrome. A proof of concept study.		2009-011819-20	2009-10-01	2010-05-01	interventional	yes	point	N/A	N/A	not specified	not specified	yes	yes - "morning" and "evening" doses	yes

## Sheet: analysed - QT-prolongating drug
	Title	US study number	EU study number	study start date	study end date	study type	ECG measured?	continual or point recordings?	continual: how long for? (eg 24hrs)	continual: diurnal analysis?	point readings: how many readings?	point readings: time point specified?	drug administered?	time of day drug administered specified?	results?
	Abnormal QT-Response to the Sudden Tachycardia Provoked by Standing in Individuals With Drug-induced Long QT Syndrome	NCT02581241		2016-01-01	2017-08-01	interventional	yes	point	N/A	N/A	"repeatedly" for duration of study	not specified	no	N/A	no
	QT-prolongation in Psychiatric Hospitals	NCT02043925		2010-10-01	2015-03-01	observational (cohort, prospective)	yes	point	N/A	N/A	2 - once before drug administration and one week after starting it	not specified	yes	not specified	no
	Genetics of QT Prolongation With Antiarrhythmics	NCT02439658		2015-05-01	2018-08-01	observational (case-control, prospective)	yes	point	N/A	N/A	not specified	not specified (available clinical data)	yes	not specified	no
	Influence of Testosterone Administration on Drug-Induced QT Interval Prolongation and Torsades de Pointes	NCT02513940		2015-08-01	2019-03-01	interventional, phase 4	yes	point	N/A	N/A	not specified	not specified	yes	yes - "in the morning / every evening"	yes
	Reducing the Risk of Drug-Induced QT Interval Lengthening in Women	NCT03834883		2019-03-01	2022-06-01	interventional, phase 4	yes	point	N/A	N/A	"serially for 8 hours" (following ibutilide)	yes - "in the morning"	yes	yes - "in the morning"	no
	Continuous Versus Intermittent cARdiac Electrical moNitorinG	NCT04336644		2020-08-01	2022-09-01	interventional	yes	both	30 days (continuous patch)	not specified	"numerous"	not specified	no	N/A	no
	Effect of Methadone and Hydromorphone on the QT Interval After Anesthesia and Surgery	NCT03893734		2018-05-01	2020-08-01	interventional, phase 4	yes	point	N/A	N/A	not specified	not specified (specified in relation to drug administration)	yes	not specified	no
	QT-Prolongation in Lung Transplantation	NCT02380365		2015-04-01	2016-04-01	observational (cohort, prospective)	yes	point	N/A	N/A	not specified	not specified	no	N/A	no
	Effects Rapid Atrial Pacing Has on the Electrocardiogram (ECG) in Patients With Dual Chamber Pacemakers	NCT00883610		2009-04-01	2012-06-01	observational (cohort, prospective)	yes	both	2 days	not specified	not specified	not specified	no	N/A	no
	Does Azithromycin Cause QT Prolongation in Hospitalized Patients With Severe Community Acquired Pneumonia?	NCT01553734		2012-03-01	2013-05-01	observational (cohort, prospective)	yes	point	N/A	N/A	"daily"	not specified	yes	not specified	no
	Prevelance of Fragmented QRS Complex and Prolonged QT Interval in Cirrhotic Patients	NCT03158701		2017-06-01	2018-06-01	observational (cohort, prospective)	yes	point	N/A	N/A	not specified	not specified	no	N/A	no
	CiPA Phase 1 ECG Biomarker Validation Study	NCT03070470		2017-03-01	2017-06-01	interventional, phase 1	yes	point	N/A	N/A	3 (one on each day)	not specified	yes	not specified	yes
	Ability of Late Sodium or Calcium Current Block to Balance the ECG Effects of Potassium Current Block	NCT02308748		2014-05-01	2014-06-01	interventional, phase 1	yes	point	N/A	N/A	during each treatment period	not specified	yes	not specified	yes
	Drug-induced Repolarization ECG Changes	NCT03642405		2018-08-01	2019-09-01	observational (cohort, prospective)	yes	point	N/A	N/A	not specified	not specified	yes	not specified	no
	Fetal Electrophysiologic Abnormalities in High-Risk Pregnancies Associated With Fetal Demise	NCT03775954		2018-07-01	2022-04-01	observational (cohort, prospective)	yes	point	N/A	N/A	not specified	not specified	no	N/A	no
	The Effect of General Anesthesia on the Risk for Arrhythmia	NCT01174251		2010-12-01	2013-04-01	observational (cohort, prospective)	yes	continual	before, during and after general anaesthesia	not specified	N/A	N/A	yes	not specified	no
	The Effect of Energy Drink on Cardiovascular Variables: A Randomized Controlled Trial	NCT03841838		2019-02-01	2019-05-01	interventional	yes	point	N/A	N/A	not specified	not specified (specified in relation to energy drink administration)	yes (energy drink)	not specified	no
	A Study to Investigate the Effect of Single Dose of AZD6094 (600 mg) on Cardiac Repolarization in Healthy Volunteers	NCT03258515		2017-09-01	2018-03-01	interventional, phase 1	yes	point	N/A	N/A	"numerous"	not specified (specified in relation to drug administration)	yes	not specified	no
	Ondansetron and the QT Interval In Adult Emergency Department Patients	NCT01759420		2012-12-01	2014-05-01	observational (cohort, prospective)	yes	point	N/A	N/A	not specified	not specified (specified in relation to drug administration)	yes	not specified	yes
	Methadone Pharmacokinetics and Cardiac Effects in Newborns	NCT00715988		2007-10-01	2012-09-01	interventional, phase 1	yes	continual	in-patient ECG	not specified	N/A	N/A	yes	not specified	no
	Exercise Induced QT Interval Changes in Response to Intermittent and Continuous Graded Exercise Tests	NCT04005027		2019-07-01	2021-09-01	interventional	yes	point	N/A	N/A	1 (continual throughout 15 min exercise)	not specified	no	N/A	no
	Effect of a Multiple-dose Oral Administration of CG5503 PR on the Electrical Activity of the Heart in 48 Healthy Men and Women	NCT03951402		2003-03-01	2003-08-01	interventional, phase 1	yes	point	N/A	N/A	13	yes - every hour for 12 hours and then at 24 hours	yes	yes - "morning" and "evening" doses	no
	To Investigate the Effect of Intravenous Ondansetron on Cardiac Conduction as Compared to Placebo and Moxifloxacin in Healthy Adult Subjects	NCT01449188		2011-08-01	2011-12-01	interventional, phase 1	yes	point	N/A	N/A	not specified	not specified	yes	not specified	no
	Food and Insulin Effect on QT/QTC Interval of ECG	NCT01642485		2011-07-01	2014-08-01	interventional, phase 1	yes	point	N/A	N/A	"numerous"	not specified	yes	yes - "breakfast" (morning)	yes
	Genetics of QT Response to Moxifloxacin	NCT01936480		2013-10-01	2019-09-01	interventional, phase 4	yes	point	N/A	N/A	12 - at 30 min intervals up to 6 hours after administration of drug	yes - specified in relation to drug admin at 9am	yes	yes - "9AM in the morning (diurnal variation in QT interval is well recognised)"	no
	Study To Evaluate The Effect Of A Multiple Oral Dose Of PF-00232798 On QT Intervals In Healthy Subjects	NCT01140425		2010-07-01	2010-12-01	interventional, phase 1	yes	point	N/A	N/A	not specified	not specified	yes	not specified	no
	Effect of Antenatal SSRI Exposure on the QT Interval of Neonates	NCT02492347		2016-02-01	2017-08-01	interventional	yes	point	N/A	N/A	not specified	not specified	no	N/A	no
	P Wave and QT Dispersion in Psoriasis	NCT02045485		2006-01-01	2006-06-01	observational (case-control, prospective)	yes	point	N/A	N/A	not specified	not specified	no	N/A	no
	A Phase I Study to Assess the Safety, Pharmacokinetics, and Potential Effects of Amrubicin on the QT/QTc Interval in Cancer Patients With Advanced Solid Tumors.	NCT00915083		2009-06-01	2011-05-01	interventional, phase 1	yes	continual	3 days	not specified	N/A	N/A	yes	not specified	no
	Methadone-Induced QT Interval Prolongation in a Narcotic Treatment Center	NCT02898337		2016-11-01	2020-06-01	observational (cohort)	yes	point	N/A	N/A	not specified	not specified	no	N/A	no
	A Single-Blind, Multicenter, Placebo-Controlled, Sequential Design Study Evaluating the Potential Effects of a Single-Dose Administration of Trabectedin on the QT Intervals of the Electrocardiogram		2008-004967-21	2008-10-01	2009-12-01	interventional	yes	point	N/A	N/A	over 8	not specified (specified in relation to drug administration)	yes	not specified	yes
	A Single-Centre, Double-blind, Double-dummy, Randomised, Placebo Controlled, Four Period Crossover Study to Assess the Effect of Single Oral Doses of AZD5672 (600mg and 150mg) on QT/QTc Interval, C.		2009-011044-20	2009-04-01	2009-07-01	interventional	yes	point	N/A	N/A	not specified	yes - "time matched analysis"	yes	not specified	no
